# Supplementary material for: Prevention of colorectal cancer and modulation of murine gut microbiota using functional meats
Source: Royal Society of Chemistry journal article supplement (doi:10.1039/d5fo04442a), 2026-01-01
Supplement: d5fo04442a2.xlsx [file d5fo04442a2.xlsx]

## Sheet: Hoja1
Measurement	Global Test	Global p value	Comparison	Mean Difference	95% CI	Adjusted p value
Body weight change during first cholitis	Kruskal-Wallis test	<0.0001	C > FM1	27.38		0.0019
			C > FM3	27.21		0.0036
			C > FM4	35.13		<0.0001
			C > FM5	25.5		0.0156
Body weight change during second cholitis	Brown-Forsythe ANOVA test	<0.0001	C < FM1	-32.16	-66.18 to 1.867	0.0336
			C < FM2	-38.69	-72.69 to -4.683	0.0123
			FM1 > FM3	20.01	-1.367 to 41.40	0.0362
			FM1 > FM4	21.7	3.902 to 39.50	0.0069
			FM2 > FM3	26.54	5.193 to 47.89	0.0067
			FM2 > FM4	28.23	10.47 to 45.99	0.001
			FM2 > FM5	25.43	3.568 to 47.30	0.0109
Number of tumors	Ordinary One-Way ANOVA Test	0.0255	FM1 < FM2	-18.29	-34.56 to -2.012	0.0191
			FM1 < FM3	-16.43	-32.70 to -0.1552	0.0466
			FM1 < FM4	-16.71	-32.99 to -0.4409	0.0408
Tumoral Area	Ordinary One-Way ANOVA Test	0.0165	CM > FM1	423.3	92.91 to 753.8	0.005
Number of Peyers Patches	Ordinary One-Way ANOVA Test	<0.0001	C > FM1	4.143	1.852 to 6.434	<0.0001
			C > FM2	3.571	1.280 to 5.863	0.0004
			C > FM3	2.429	0.1373 to 4.720	0.0317
			C > FM4	5.571	3.280 to 7.863	<0.0001
			C > FM5	5.738	3.353 to 8.123	<0.0001
			CM > FM1	4.071	1.385 to 6.758	0.0006
			CM > FM2	3.5	0.8133 to 6.187	0.0042
			CM > FM4	5.5	2.813 to 8.187	<0.0001
			CM > FM5	5.667	2.900 to 8.434	<0.0001
			FM3 > FM4	3.143	0.8516 to 5.434	0.0022
			FM3 > FM5	3.31	0.9247 to 5.694	0.0019
Relative Cecal Weight	Brown-Forsythe ANOVA test	<0.0001	C < FM1	-0.01459	-0.01956 to -0.009622	<0.0001
			C < FM3	-0.01867	-0.03324 to -0.004108	0.0062
			CM < FM1	-0.01367	-0.01952 to -0.007826	<0.0001
			CM < FM3	-0.01776	-0.03243 to -0.003082	0.0087
			FM1 > FM2	0.01224	0.006859 to 0.01761	<0.0001
			FM1 > FM5	0.01393	0.009159 to 0.01870	<0.0001
			FM2 < FM3	-0.01632	-0.03109 to -0.001551	0.0145
			FM3 > FM5	0.01802	0.003643 to 0.03239	0.0071
