# Supplementary material for: Prevention of colorectal cancer and modulation of murine gut microbiota using functional meats
Source: Royal Society of Chemistry journal article supplement (doi:10.1039/d5fo04442a), 2026-01-01
Supplement: d5fo04442a3.xlsx [file d5fo04442a3.xlsx]

## Sheet: Hoja1
feature	value	coef	stderr	N	N.not.0	pval	qval
d__Bacteria.p__Bacillota_A_368345.c__Clostridia_258483.o__Lachnospirales.f__Lachnospiraceae.g__Eubacterium_Q.s__	C vs CM	6.98323	1.6559	45	5	0.000147477	0.00226924
d__Bacteria.p__Bacillota_A_368345.c__Clostridia_258483.o__Lachnospirales.f__Lachnospiraceae.g__1XD8.76.s__1XD8.76.sp003611955	C vs CM	5.76796	2.81596	45	37	0.047484	0.1703
d__Bacteria.p__Bacillota_I.c__Bacilli_A.o__MOL361.f__Turicibacteraceae.g__Turicibacter.s__Turicibacter.bilis	C vs CM	4.70931	1.1641	45	20	0.000246698	0.00341087
d__Bacteria.p__Bacillota_A_368345.c__Clostridia_258483.o__Oscillospirales.f__Oscillospiraceae_88309.g__Limivicinus.s__Limivicinus.sp002320035	C vs CM	4.39201	1.86373	45	42	0.0237022	0.107009
d__Bacteria.p__Bacteroidota.c__Bacteroidia.o__Bacteroidales.f__Marinifilaceae.g__Odoribacter_865974.s__Odoribacter.splanchnicus	C vs CM	4.11537	1.68685	45	22	0.0194778	0.0960705
d__Bacteria.p__Bacillota_A_368345.c__Clostridia_258483.o__TANB77.f__CAG.508.g__UMGS1994.s__UMGS1994.sp900553945	C vs CM	4.10893	1.0288	45	9	0.000287555	0.00388338
d__Bacteria.p__Bacillota_I.c__Bacilli_A.o__Erysipelotrichales.f__Erysipelotrichaceae.g__Clostridium_AQ.s__Clostridium_AQ.innocuum	C vs CM	4.10374	1.76945	45	33	0.0258569	0.112125
d__Bacteria.p__Bacillota_A_368345.c__Clostridia_258483.o__Oscillospirales.f__Acutalibacteraceae.g__Ruminococcus_E.s__Ruminococcus_E.bromii_B	C vs CM	4.07201	1.8065	45	15	0.0300386	0.122465
d__Bacteria.p__Bacillota_A_368345.c__Clostridia_258483.o__Clostridiales.f__Clostridiaceae_222000.g__Clostridium_T.s__Clostridium_T.celatum	C vs CM	3.50134	1.42618	45	10	0.0187763	0.0942769
d__Bacteria.p__Bacillota_A_368345.c__Clostridia_258483.o__Peptostreptococcales.f__Anaerovoracaceae.g__Lentihominibacter.s__Lentihominibacter.butyrica	C vs CM	3.37026	1.30771	45	23	0.0139652	0.0770106
d__Bacteria.p__Bacillota_A_368345.c__Clostridia_258483.o__Peptostreptococcales.f__Peptostreptococcaceae_256921.g__Romboutsia_B.s__Romboutsia_B.maritimum	C vs CM	3.34528	1.84039	45	30	0.0770002	0.232463
d__Bacteria.p__Pseudomonadota.c__Gammaproteobacteria.o__Enterobacterales_737866.f__Pasteurellaceae.g__Rodentibacter_A_734545.s__Rodentibacter_A_734545.mrazii	C vs CM	3.20575	1.08914	45	15	0.00550987	0.0386501
d__Bacteria.p__Bacillota_A_368345.c__Clostridia_258483.o__Oscillospirales.f__Ruminococcaceae.g__Massilioclostridium.s__	C vs CM	3.04756	1.50442	45	33	0.0498556	0.174861
d__Bacteria.p__Bacteroidota.c__Bacteroidia.o__Bacteroidales.f__Muribaculaceae.g__UBA3263.s__UBA3263.sp001689615	C vs CM	2.96864	1.3272	45	7	0.0312474	0.126851
d__Bacteria.p__Bacillota_A_368345.c__Clostridia_258483.o__TANB77.f__CAG.508.g__CAG.269.s__CAG.269.sp000431335	C vs CM	2.81084	1.48631	45	32	0.0662448	0.209263
d__Bacteria.p__Bacillota_A_368345.c__Clostridia_258483.o__Oscillospirales.f__Ruminococcaceae.g__Paludihabitans.s__Paludihabitans.psychrotolerans	C vs CM	2.72452	1.44685	45	38	0.0673625	0.212092
d__Bacteria.p__Bacillota_A_368345.c__Clostridia_258483.o__Oscillospirales.f__Oscillospiraceae_88309.g__Faecousia.s__	C vs CM	2.65692	1.27235	45	18	0.0435335	0.163508
d__Bacteria.p__Bacillota_I.c__Bacilli_A.o__Lactobacillales.f__Enterococcaceae.g__Enterococcus_H_360604.s__Enterococcus_H_360604.faecalis	C vs CM	2.3921	1.03393	45	16	0.0261956	0.11308
d__Bacteria.p__Bacillota_A_368345.c__Clostridia_258483.o__Lachnospirales.f__Lachnospiraceae.g__UBA9414.s__	C vs CM	1.9439	1.09673	45	7	0.0843366	0.249093
d__Bacteria.p__Bacteroidota.c__Bacteroidia.o__Bacteroidales.f__Muribaculaceae.g__Duncaniella.s__Duncaniella.muricolitica	C vs CM	1.71778	0.836543	45	8	0.04696	0.169684
d__Bacteria.p__Bacillota_A_368345.c__Clostridia_258483.o__Lachnospirales.f__Lachnospiraceae.g__Butyrivibrio_A_180067.s__Butyrivibrio_A_180067.crossotus	C vs CM	0.312672	0.133685	45	2	0.0247017	0.108596
d__Bacteria.p__Bacillota_A_368345.c__Clostridia_258483.o__Oscillospirales.f__Ruminococcaceae.g__Porcipelethomonas.s__Porcipelethomonas.ammoniilytica	C vs CM	-0.25	0.0880554	45	1	0.00722514	0.0462603
d__Bacteria.p__Bacillota_A_368345.c__Clostridia_258483.o__Lachnospirales.f__Lachnospiraceae.g__Suilimivivens.s__Suilimivivens.aceti	C vs CM	-0.25	0.0880554	45	1	0.00722514	0.0462603
d__Bacteria.p__Bacillota_A_368345.c__Clostridia_258483.o__Peptostreptococcales.f__Peptostreptococcaceae_256921.g__Romboutsia_E.s__	C vs CM	-0.451403	0.229505	45	2	0.0565339	0.191253
d__Bacteria.p__Bacteroidota.c__Bacteroidia.o__Bacteroidales.f__Tannerellaceae.g__Parabacteroides_B_862066.s__Parabacteroides_B_862066.goldsteinii	C vs CM	-1.34889	0.588693	45	45	0.0275792	0.114893
d__Bacteria.p__Bacillota_A_368345.c__Clostridia_258483.o__Lachnospirales.f__Lachnospiraceae.g__COE1.s__	C vs CM	-1.5213	0.772177	45	5	0.0561413	0.191204
d__Bacteria.p__Bacillota_I.c__Bacilli_A.o__Bacillales_A.f__Planococcaceae.g__Lysinibacillus_304693.s__	C vs CM	-1.66781	0.594932	45	2	0.00792041	0.0500402
d__Bacteria.p__Bacillota_I.c__Bacilli_A.o__Erysipelotrichales.f__Erysipelotrichaceae.g__Holdemania.s__Holdemania.sp900120005	C vs CM	-1.76481	0.465373	45	6	0.000520322	0.00612823
d__Bacteria.p__Bacteroidota.c__Bacteroidia.o__Bacteroidales.f__Bacteroidaceae.g__Bacteroides_H_857956.s__Bacteroides_H_857956.faecichinchillae	C vs CM	-2.21748	1.07945	45	44	0.0468747	0.169684
d__Bacteria.p__Bacteroidota.c__Bacteroidia.o__Bacteroidales.f__Muribaculaceae.g__Duncaniella.s__Duncaniella.muris	C vs CM	-2.28645	0.927634	45	33	0.0183417	0.0934241
d__Bacteria.p__Bacillota_A_368345.c__Clostridia_258483.o__Lachnospirales.f__Lachnospiraceae.g__Faecalimonas.s__Faecalimonas.umbilicata	C vs CM	-2.32446	0.221264	45	4	8.52036e-13	8.12842e-10
d__Bacteria.p__Bacillota_A_368345.c__Clostridia_258483.o__UBA1381.f__UBA1381.g__Hominilimicola.s__Hominilimicola.sp001941225	C vs CM	-2.4506	1.18234	45	26	0.045036	0.166654
d__Bacteria.p__Bacillota_I.c__Bacilli_A.o__Erysipelotrichales.f__Erysipelotrichaceae.g__Faecalibaculum.s__Faecalibaculum.rodentium	C vs CM	-2.66176	1.16729	45	8	0.0282878	0.116825
d__Bacteria.p__Bacillota_I.c__Bacilli_A.o__Erysipelotrichales.f__Erysipelotrichaceae.g__Holdemania.s__Holdemania.massiliensis	C vs CM	-2.71221	0.984885	45	42	0.00898631	0.0549547
d__Bacteria.p__Pseudomonadota.c__Gammaproteobacteria.o__Burkholderiales.f__Burkholderiaceae_A_595427.g__Parasutterella_564865.s__Parasutterella.excrementihominis	C vs CM	-2.83774	0.921102	45	45	0.00382751	0.0297606
d__Bacteria.p__Bacillota_A_368345.c__Clostridia_258483.o__Lachnospirales.f__Lachnospiraceae.g__Enterocloster.s__Enterocloster.asparagiformis	C vs CM	-2.91265	1.20495	45	41	0.0205453	0.0984936
d__Bacteria.p__Bacillota_A_368345.c__Clostridia_258483.o__Peptostreptococcales.f__Anaerovoracaceae.g__Emergencia.s__Emergencia.timonensis	C vs CM	-2.98	1.35775	45	22	0.0343585	0.135069
d__Bacteria.p__Bacillota_A_368345.c__Clostridia_258483.o__Oscillospirales.f__Acutalibacteraceae.g__Eubacterium_R.s__Eubacterium_R.sp000436835	C vs CM	-3.4027	1.78095	45	19	0.063622	0.204362
d__Bacteria.p__Bacillota_I.c__Bacilli_A.o__Lactobacillales.f__Lactobacillaceae.g__Limosilactobacillus.s__Limosilactobacillus.reuteri	C vs CM	-3.41338	1.61192	45	33	0.0408115	0.156183
d__Bacteria.p__Bacillota_A_368345.c__Clostridia_258483.o__Lachnospirales.f__Lachnospiraceae.g__Enterocloster.s__Enterocloster.pacaense	C vs CM	-3.51853	1.60824	45	32	0.0349042	0.13647
d__Bacteria.p__Cyanobacteriota.c__Vampirovibrionia.o__Gastranaerophilales.f__Gastranaerophilaceae.g__CAG.196.s__CAG.196.sp002102975	C vs CM	-3.52417	1.08789	45	8	0.00249008	0.0214258
d__Bacteria.p__Bacillota_A_368345.c__Clostridia_258483.o__Lachnospirales.f__Lachnospiraceae.g__Blautia_A_141781.s__Blautia_A_141781.caecimuris	C vs CM	-4.10948	2.06958	45	25	0.0543215	0.187086
d__Bacteria.p__Bacillota_A_368345.c__Clostridia_258483.o__Lachnospirales.f__Lachnospiraceae.g__Enterocloster.s__Enterocloster.clostridioformis	C vs CM	-4.15702	1.90195	45	38	0.0350725	0.136568
d__Bacteria.p__Bacillota_A_368345.c__Clostridia_258483.o__Lachnospirales.f__Lachnospiraceae.g__MD308.s__MD308.sp000403475	C vs CM	-4.40023	1.22194	45	20	0.000904022	0.0096903
d__Bacteria.p__Bacillota_A_368345.c__Clostridia_258483.o__Oscillospirales.f__Ruminococcaceae.g__Anaerotruncus.s__Anaerotruncus.sp000403395	C vs CM	-4.53429	1.42904	45	19	0.00298522	0.0247643
d__Bacteria.p__Bacillota_A_368345.c__Clostridia_258483.o__Oscillospirales.f__Ruminococcaceae.g__Massiliimalia.s__Massiliimalia.timonensis	C vs CM	-4.87433	1.17315	45	27	0.000177847	0.00269312
d__Bacteria.p__Bacillota_A_368345.c__Clostridia_258483.o__Lachnospirales.f__Lachnospiraceae.g__Otoolea_134526.s__	C vs CM	-4.88358	1.85624	45	22	0.0122335	0.06825
d__Bacteria.p__Bacillota_I.c__Bacilli_A.o__Lactobacillales.f__Lactobacillaceae.g__Lactobacillus.s__Lactobacillus.johnsonii	C vs CM	-5.25413	1.65237	45	26	0.00293069	0.0245252
d__Bacteria.p__Bacillota_I.c__Bacilli_A.o__Erysipelotrichales.f__Erysipelotrichaceae.g__Longicatena.s__Longicatena.caecimuris	C vs CM	-7.3511	1.72591	45	36	0.000129894	0.00206531
d__Bacteria.p__Bacillota_A_368345.c__Clostridia_258483.o__Lachnospirales.f__Lachnospiraceae.g__Suilimivivens.s__Suilimivivens.sp000403495	C vs CM	-8.34178	2.70848	45	25	0.00383706	0.0297606
