# Supplementary material for: Prevention of colorectal cancer and modulation of murine gut microbiota using functional meats
Source: Royal Society of Chemistry journal article supplement (doi:10.1039/d5fo04442a), 2026-01-01
Supplement: d5fo04442a4.xlsx [file d5fo04442a4.xlsx]

## Sheet: Hoja1
feature	value	coef	stderr	N	N.not.0	pval	qval
d__Bacteria.p__Bacillota_A_368345.c__Clostridia_258483.o__TANB77.f__CAG.508.g__.s__	CM vs FM5	6.38867	1.50735	45	20	0.000138356	0.0038821
d__Bacteria.p__Bacillota_A_368345.c__Clostridia_258483.o__Lachnospirales.f__Lachnospiraceae.g__Suilimivivens.s__Suilimivivens.sp000403495	CM vs FM5	6.35029	2.78934	45	25	0.0285275	0.118844
d__Bacteria.p__Bacillota_A_368345.c__Clostridia_258483.o__Oscillospirales.f__Oscillospiraceae_88309.g__.s__	CM vs FM5	5.35272	2.50007	45	33	0.0387477	0.147272
d__Bacteria.p__Bacillota_A_368345.c__Clostridia_258483.o__Clostridiales.f__Clostridiaceae_222000.g__Sarcina_200052.s__	CM vs FM5	5.08495	1.31714	45	8	0.000426046	0.00781631
d__Bacteria.p__Bacillota_I.c__Bacilli_A.o__Erysipelotrichales.f__Erysipelotrichaceae.g__Dielma.s__Dielma.fastidiosa	CM vs FM5	4.69269	0.930634	45	10	1.16264e-05	0.000462148
d__Bacteria.p__Bacillota_A_368345.c__Clostridia_258483.o__Peptostreptococcales.f__Anaerovoracaceae.g__Emergencia.s__Emergencia.timonensis	CM vs FM5	4.58652	1.39828	45	22	0.00222698	0.026912
d__Bacteria.p__Bacillota_A_368345.c__Clostridia_258483.o__Oscillospirales.f__Oscillospiraceae_88309.g__Intestinimonas.s__Intestinimonas.butyriciproducens	CM vs FM5	4.43341	1.51635	45	38	0.00580051	0.0526167
d__Bacteria.p__Bacillota_A_368345.c__Clostridia_258483.o__Lachnospirales.f__Lachnospiraceae.g__Mediterraneibacter_A_155507.s__Mediterraneibacter_A_155507.torques	CM vs FM5	4.13065	1.47428	45	6	0.00795192	0.0542116
d__Bacteria.p__Bacillota_A_368345.c__Clostridia_258483.o__Lachnospirales.f__Lachnospiraceae.g__Otoolea_134526.s__	CM vs FM5	4.07914	1.91166	45	22	0.0393724	0.148463
d__Bacteria.p__Bacillota_I.c__Bacilli_A.o__Erysipelotrichales.f__Erysipelotrichaceae.g__Faecalibaculum.s__Faecalibaculum.rodentium	CM vs FM5	3.91027	1.20214	45	8	0.00240086	0.0275955
d__Bacteria.p__Bacillota_A_368345.c__Clostridia_258483.o__Lachnospirales.f__Lachnospiraceae.g__Blautia_A_141781.s__Blautia_A_141781.caecimuris	CM vs FM5	3.80148	2.13138	45	25	0.08248	0.239702
d__Bacteria.p__Cyanobacteriota.c__Vampirovibrionia.o__Gastranaerophilales.f__Gastranaerophilaceae.g__CAG.196.s__CAG.196.sp002102975	CM vs FM5	3.52417	1.12037	45	8	0.00321549	0.0329847
d__Bacteria.p__Bacillota_A_368345.c__Clostridia_258483.o__Oscillospirales.f__Oscillospiraceae_88309.g__Evtepia.s__Evtepia.viridis	CM vs FM5	3.45026	1.5414	45	39	0.031133	0.125781
d__Bacteria.p__Bacillota_I.c__Bacilli_A.o__Lactobacillales.f__Lactobacillaceae.g__Lactobacillus.s__Lactobacillus.johnsonii	CM vs FM5	3.09441	1.70171	45	26	0.0768893	0.22978
d__Bacteria.p__Bacillota_A_368345.c__Clostridia_258483.o__Lachnospirales.f__Lachnospiraceae.g__MD308.s__MD308.sp000403475	CM vs FM5	3.01462	1.25843	45	20	0.0216273	0.101781
d__Bacteria.p__Bacillota_A_368345.c__Clostridia_258483.o__Clostridiales.f__Clostridiaceae_222000.g__Clostridium_T.s__Clostridium_T.celatum	CM vs FM5	2.8907	1.46877	45	10	0.0563834	0.181594
d__Bacteria.p__Bacillota_A_368345.c__Clostridia_258483.o__Oscillospirales.f__Ruminococcaceae.g__Anaerotruncus.s__Anaerotruncus.sp000403395	CM vs FM5	2.81494	1.47171	45	19	0.0633444	0.197485
d__Bacteria.p__Bacillota_I.c__Bacilli_A.o__Erysipelotrichales.f__Erysipelotrichaceae.g__Holdemania.s__Holdemania.sp900120005	CM vs FM5	2.52695	0.479268	45	6	5.65138e-06	0.000317142
d__Bacteria.p__Bacillota_A_368345.c__Clostridia_258483.o__Peptostreptococcales.f__Peptostreptococcaceae_256921.g__Faecalimicrobium.s__Faecalimicrobium.dakarense	CM vs FM5	2.52253	1.0866	45	7	0.0257212	0.11256
d__Bacteria.p__Bacillota_A_368345.c__Clostridia_258483.o__Oscillospirales.f__Ruminococcaceae.g__Massiliimalia.s__Massiliimalia.timonensis	CM vs FM5	2.37076	1.20817	45	27	0.0570846	0.182136
d__Bacteria.p__Bacillota_A_368345.c__Clostridia_258483.o__Lachnospirales.f__Lachnospiraceae.g__Faecalimonas.s__Faecalimonas.umbilicata	CM vs FM5	2.32446	0.22787	45	4	1.95888e-12	3.11462e-10
d__Bacteria.p__Bacillota_A_368345.c__Clostridia_258483.o__Lachnospirales.f__Lachnospiraceae.g__UBA9414.s__	CM vs FM5	2.32075	1.12947	45	7	0.0468285	0.162909
d__Bacteria.p__Bacillota_A_368345.c__Clostridia_258483.o__Lachnospirales.f__Lachnospiraceae.g__Muricomes_149720.s__	CM vs FM5	1.79367	0.646592	45	5	0.00853613	0.0573484
d__Bacteria.p__Desulfobacterota_G_459543.c__Desulfovibrionia.o__Desulfovibrionales.f__Desulfovibrionaceae.g__Bilophila.s__Bilophila.wadsworthia	CM vs FM5	1.62936	0.833569	45	44	0.0580075	0.184464
d__Bacteria.p__Bacillota_A_368345.c__Clostridia_258483.o__Lachnospirales.f__Lachnospiraceae.g__COE1.s__	CM vs FM5	1.5213	0.795232	45	5	0.0633024	0.197485
d__Bacteria.p__Bacillota_A_368345.c__Clostridia_258483.o__Oscillospirales.f__Ruminococcaceae.g__Massilioclostridium.s__Massilioclostridium.methylpentosum	CM vs FM5	-2.15067	0.932419	45	24	0.0266268	0.114269
d__Bacteria.p__Pseudomonadota.c__Gammaproteobacteria.o__Pseudomonadales_A_650611.f__Pseudomonadaceae.g__Pseudomonas_E_647464.s__Pseudomonas_E_647464.paraversuta	CM vs FM5	-2.17698	1.07246	45	17	0.0494108	0.167473
d__Bacteria.p__Bacillota_A_368345.c__Clostridia_258483.o__Oscillospirales.f__Oscillospiraceae_88309.g__Faecousia.s__	CM vs FM5	-2.32919	1.31034	45	18	0.0834827	0.240612
d__Bacteria.p__Bacillota_A_368345.c__Clostridia_258483.o__Oscillospirales.f__Acutalibacteraceae.g__UBA5905.s__	CM vs FM5	-3.18467	1.40615	45	35	0.0293107	0.120528
d__Bacteria.p__Bacillota_A_368345.c__Clostridia_258483.o__Oscillospirales.f__Ruminococcaceae.g__Ruthenibacterium.s__Ruthenibacterium.lactatiformans	CM vs FM5	-3.35223	1.66899	45	42	0.0517307	0.172556
d__Bacteria.p__Bacillota_A_368345.c__Clostridia_258483.o__TANB77.f__CAG.508.g__CAG.269.s__CAG.269.sp000431335	CM vs FM5	-3.54385	1.53068	45	32	0.0260983	0.11308
d__Bacteria.p__Bacillota_A_368345.c__Clostridia_258483.o__Lachnospirales.f__Lachnospiraceae.g__Eisenbergiella.s__Eisenbergiella.porci	CM vs FM5	-3.6131	1.75931	45	36	0.0469327	0.162909
d__Bacteria.p__Bacillota_A_368345.c__Clostridia_258483.o__Oscillospirales.f__Ruminococcaceae.g__Massilioclostridium.s__	CM vs FM5	-4.24762	1.54934	45	33	0.00927002	0.0589574
d__Bacteria.p__Deferribacterota.c__Deferribacteres.o__Deferribacterales.f__Mucispirillaceae.g__Mucispirillum.s__Mucispirillum.schaedleri	CM vs FM5	-4.8882	2.2198	45	19	0.0338001	0.132623
d__Bacteria.p__Bacillota_A_368345.c__Clostridia_258483.o__Lachnospirales.f__Lachnospiraceae.g__Roseburia_A_166204.s__Roseburia_A_166204.intestinalis	CM vs FM5	-5.10664	2.02605	45	28	0.0160381	0.0840677
d__Bacteria.p__Bacillota_A_368345.c__Clostridia_258483.o__Lachnospirales.f__Lachnospiraceae.g__1XD8.76.s__1XD8.76.sp003611955	CM vs FM5	-6.19131	2.90003	45	37	0.0392771	0.148463
d__Bacteria.p__Bacillota_A_368345.c__Clostridia_258483.o__Oscillospirales.f__Ruminococcaceae.g__Ruminococcus_C_59129.s__Ruminococcus_C_59129.flavefaciens_F	CM vs FM5	-6.33631	2.46831	45	15	0.0143174	0.0785468
