# Supplementary material for: Prevention of colorectal cancer and modulation of murine gut microbiota using functional meats
Source: Royal Society of Chemistry journal article supplement (doi:10.1039/d5fo04442a), 2026-01-01
Supplement: d5fo04442a5.xlsx [file d5fo04442a5.xlsx]

## Sheet: Hoja1
feature	value	coef	stderr	N	N.not.0	pval	qval
d__Bacteria.p__Bacillota_A_368345.c__Clostridia_258483.o__Oscillospirales.f__Acutalibacteraceae.g__Eubacterium_R.s__Eubacterium_R.sp000436835	FM5 vs FM 2	4.83511	1.58082	45	19	0.00406158	0.0661678
d__Bacteria.p__Bacillota_A_368345.c__Clostridia_258483.o__Lachnospirales.f__Lachnospiraceae.g__Luxibacter.s__Luxibacter.massiliensis	FM5 vs FM 2	3.56021	1.48625	45	25	0.0216331	0.175114
d__Bacteria.p__Bacillota_A_368345.c__Clostridia_258483.o__Oscillospirales.f__Oscillospiraceae_88309.g__Evtepia.s__	FM5 vs FM 2	3.12339	1.33222	45	26	0.0243798	0.182469
d__Bacteria.p__Bacillota_A_368345.c__Clostridia_258483.o__Oscillospirales.f__Ruminococcaceae.g__Anaerotruncus.s__Anaerotruncus.sp000403395	FM5 vs FM 2	3.08609	1.26845	45	19	0.0197923	0.175114
d__Bacteria.p__Bacillota_A_368345.c__Clostridia_258483.o__Oscillospirales.f__Ruminococcaceae.g__Anaerotruncus.s__Anaerotruncus.colihominis	FM5 vs FM 2	2.80459	1.07435	45	42	0.0128668	0.130584
d__Bacteria.p__Bacillota_A_368345.c__Clostridia_258483.o__Lachnospirales.f__Lachnospiraceae.g__Schaedlerella.s__Schaedlerella.sp000403295	FM5 vs FM 2	2.69692	1.1512	45	14	0.0244822	0.182469
d__Bacteria.p__Bacillota_A_368345.c__Clostridia_258483.o__.f__.g__.s__	FM5 vs FM 2	2.69081	1.13743	45	26	0.0232016	0.181479
d__Bacteria.p__Pseudomonadota.c__Gammaproteobacteria.o__Pseudomonadales_A_650611.f__Pseudomonadaceae.g__Pseudomonas_E_647464.s__Pseudomonas_E_647464.paraversuta	FM5 vs FM 2	2.17698	0.924343	45	17	0.0237799	0.182469
d__Bacteria.p__Bacteroidota.c__Bacteroidia.o__Bacteroidales.f__Bacteroidaceae.g__Bacteroides_H_857956.s__Bacteroides_H_857956.faecichinchillae	FM5 vs FM 2	-2.15613	0.958148	45	44	0.0302988	0.205
d__Bacteria.p__Bacillota_A_368345.c__Clostridia_258483.o__Lachnospirales.f__Lachnospiraceae.g__Brotaphodocola.s__Brotaphodocola.sp003481825	FM5 vs FM 2	-2.22317	0.670522	45	9	0.00201913	0.0415185
d__Bacteria.p__Bacillota_A_368345.c__Clostridia_258483.o__Oscillospirales.f__Acutalibacteraceae.g__.s__	FM5 vs FM 2	-2.35176	1.05591	45	10	0.0319323	0.213031
d__Bacteria.p__Bacillota_A_368345.c__Clostridia_258483.o__Oscillospirales.f__Acutalibacteraceae.g__Ruminococcus_E.s__Ruminococcus_E.bromii_B	FM5 vs FM 2	-3.75757	1.6035	45	15	0.0244449	0.182469
d__Bacteria.p__Bacillota_A_368345.c__Clostridia_258483.o__Lachnospirales.f__Lachnospiraceae.g__Oliverpabstia.s__Oliverpabstia.tarda	FM5 vs FM 2	-6.08018	1.00025	45	15	4.44094e-07	0.000211833
d__Bacteria.p__Bacillota_A_368345.c__Clostridia_258483.o__Lachnospirales.f__Lachnospiraceae.g__Blautia_A_141781.s__Blautia_A_141781.caecimuris	FM5 vs FM 2	-7.8256	1.83701	45	25	0.00012962	0.00686984
