# Supplementary material for: Prevention of colorectal cancer and modulation of murine gut microbiota using functional meats
Source: Royal Society of Chemistry journal article supplement (doi:10.1039/d5fo04442a), 2026-01-01
Supplement: d5fo04442a6.xlsx [file d5fo04442a6.xlsx]

## Sheet: Hoja1
feature	value	coef	stderr	N	N.not.0	pval	qval
d__Bacteria.p__Bacillota_A_368345.c__Clostridia_258483.o__Lachnospirales.f__Lachnospiraceae.g__Enterocloster.s__Enterocloster.clostridioformis	FM5 vs FM3	7.25768	1.68821	45	38	0.000115168	0.00646296
d__Bacteria.p__Bacillota_A_368345.c__Clostridia_258483.o__Lachnospirales.f__Lachnospiraceae.g__Hungatella_A_128155.s__Hungatella_A_128155.effluvii	FM5 vs FM3	5.90224	1.66422	45	32	0.00105594	0.028782
d__Bacteria.p__Bacillota_A_368345.c__Clostridia_258483.o__Peptostreptococcales.f__Peptostreptococcaceae_256921.g__Romboutsia_B.s__Romboutsia_B.maritimum	FM5 vs FM3	5.62558	1.63357	45	30	0.00141232	0.034845
d__Bacteria.p__Bacillota_A_368345.c__Clostridia_258483.o__Lachnospirales.f__Lachnospiraceae.g__Otoolea_134252.s__Otoolea.symbiosa	FM5 vs FM3	5.27747	1.60751	45	37	0.00220923	0.0424907
d__Bacteria.p__Deferribacterota.c__Deferribacteres.o__Deferribacterales.f__Mucispirillaceae.g__Mucispirillum.s__Mucispirillum.schaedleri	FM5 vs FM3	5.19023	1.91323	45	19	0.00996841	0.109309
d__Bacteria.p__Bacillota_A_368345.c__Clostridia_258483.o__Lachnospirales.f__Lachnospiraceae.g__Luxibacter.s__Luxibacter.massiliensis	FM5 vs FM3	5.00089	1.48625	45	25	0.00176143	0.0390792
d__Bacteria.p__Bacillota_A_368345.c__Clostridia_258483.o__Oscillospirales.f__Oscillospiraceae_88309.g__Lawsonibacter.s__	FM5 vs FM3	4.86155	1.38073	45	43	0.00113548	0.0300903
d__Bacteria.p__Bacillota_A_368345.c__Clostridia_258483.o__Oscillospirales.f__Ruminococcaceae.g__Ruthenibacterium.s__Ruthenibacterium.lactatiformans	FM5 vs FM3	4.84087	1.43848	45	42	0.00175908	0.0390792
d__Bacteria.p__Bacillota_I.c__Bacilli_A.o__Erysipelotrichales.f__Erysipelotrichaceae.g__Longicatena.s__Longicatena.caecimuris	FM5 vs FM3	4.65002	1.53196	45	36	0.00432151	0.0675856
d__Bacteria.p__Bacillota_A_368345.c__Clostridia_258483.o__Lachnospirales.f__Lachnospiraceae.g__Dorea_A.s__	FM5 vs FM3	4.55092	0.987598	45	40	4.4798e-05	0.00337233
d__Bacteria.p__Bacillota_A_368345.c__Clostridia_258483.o__Lachnospirales.f__Lachnospiraceae.g__Eisenbergiella.s__Eisenbergiella.porci	FM5 vs FM3	4.41595	1.51634	45	36	0.00597716	0.0826407
d__Bacteria.p__Bacillota_A_368345.c__Clostridia_258483.o__Oscillospirales.f__Ruminococcaceae.g__Massilioclostridium.s__Massilioclostridium.methylpentosum	FM5 vs FM3	4.33755	0.803644	45	24	3.81571e-06	0.000606698
d__Bacteria.p__Bacillota_I.c__Bacilli_A.o__Erysipelotrichales.f__Erysipelotrichaceae.g__Clostridium_AQ.s__Clostridium_AQ.innocuum	FM5 vs FM3	3.95026	1.57061	45	33	0.0162486	0.153801
d__Bacteria.p__Bacillota_A_368345.c__Clostridia_258483.o__Oscillospirales.f__Ruminococcaceae.g__Anaerotruncus.s__Anaerotruncus.colihominis	FM5 vs FM3	3.92512	1.07435	45	42	0.000777685	0.0231095
d__Bacteria.p__Bacillota_A_368345.c__Clostridia_258483.o__Lachnospirales.f__Lachnospiraceae.g__Blautia_A_141780.s__Blautia_A_141780.celeris	FM5 vs FM3	3.6525	1.22492	45	38	0.00497959	0.0760913
d__Bacteria.p__Bacillota_A_368345.c__Clostridia_258483.o__Lachnospirales.f__Lachnospiraceae.g__Enterocloster.s__Enterocloster.pacaense	FM5 vs FM3	3.53055	1.42752	45	32	0.0179764	0.168132
d__Bacteria.p__Desulfobacterota_G_459543.c__Desulfovibrionia.o__Desulfovibrionales.f__Desulfovibrionaceae.g__Bilophila.s__Bilophila.wadsworthia	FM5 vs FM3	3.14616	0.718446	45	44	9.03049e-05	0.00538443
d__Bacteria.p__Bacillota_A_368345.c__Clostridia_258483.o__Lachnospirales.f__Lachnospiraceae.g__Enterocloster.s__Enterocloster.asparagiformis	FM5 vs FM3	3.14405	1.06954	45	41	0.00556435	0.0813778
d__Bacteria.p__Bacillota_A_368345.c__Clostridia_258483.o__Oscillospirales.f__Ruminococcaceae.g__Anaerotruncus.s__Anaerotruncus.sp000403395	FM5 vs FM3	3.10243	1.26845	45	19	0.0191937	0.175114
d__Bacteria.p__Bacillota_A_368345.c__Clostridia_258483.o__Christensenellales.f__Christensenellaceae.g__Christensenella.s__	FM5 vs FM3	2.95607	1.12696	45	41	0.0124738	0.127957
d__Bacteria.p__Bacteroidota.c__Bacteroidia.o__Bacteroidales.f__Bacteroidaceae.g__Bacteroides_H_857956.s__Bacteroides_H_857956.xylanisolvens	FM5 vs FM3	2.88368	0.914918	45	43	0.00316112	0.0538172
d__Bacteria.p__Bacillota_I.c__Bacilli_A.o__Erysipelotrichales.f__Erysipelotrichaceae.g__Holdemania.s__Holdemania.massiliensis	FM5 vs FM3	2.78365	0.874209	45	42	0.00289547	0.0511533
d__Bacteria.p__Bacillota_A_368345.c__Clostridia_258483.o__Lachnospirales.f__Lachnospiraceae.g__Choladousia.s__Choladousia.sp003612585	FM5 vs FM3	2.66681	0.959503	45	33	0.00842112	0.101693
d__Bacteria.p__Bacillota_A_368345.c__Clostridia_258483.o__Oscillospirales.f__Oscillospiraceae_88309.g__Lawsonibacter.s__Lawsonibacter.sp000177015	FM5 vs FM3	-0.834309	0.352689	45	4	0.023208	0.181479
d__Bacteria.p__Bacteroidota.c__Bacteroidia.o__Bacteroidales.f__Bacteroidaceae.g__Phocaeicola_A.s__Phocaeicola_A.vulgatus	FM5 vs FM3	-1.70232	0.800473	45	44	0.040003	0.235573
d__Bacteria.p__Bacillota_A_368345.c__Clostridia_258483.o__Lachnospirales.f__Lachnospiraceae.g__Roseburia_A_166204.s__Roseburia_A_166204.sp001940165	FM5 vs FM3	-1.9401	0.596642	45	6	0.00240785	0.0441749
d__Bacteria.p__Bacillota_A_368345.c__Clostridia_258483.o__Lachnospirales.f__Lachnospiraceae.g__Roseburia_A_166204.s__Roseburia_A_166204.cecicola	FM5 vs FM3	-2.17986	0.894168	45	18	0.0195624	0.175114
d__Bacteria.p__Bacillota_A_368345.c__Clostridia_258483.o__Oscillospirales.f__Oscillospiraceae_88309.g__Dysosmobacter.s__	FM5 vs FM3	-2.57215	0.979481	45	26	0.0123819	0.127957
d__Bacteria.p__Bacillota_A_368345.c__Clostridia_258483.o__Oscillospirales.f__Ruminococcaceae.g__Paludihabitans.s__Paludihabitans.psychrotolerans	FM5 vs FM3	-2.76697	1.28426	45	38	0.0376023	0.231436
d__Bacteria.p__Bacillota_A_368345.c__Clostridia_258483.o__Oscillospirales.f__Oscillospiraceae_88309.g__Evtepia.s__Evtepia.viridis	FM5 vs FM3	-2.94818	1.32852	45	39	0.032523	0.213881
d__Bacteria.p__Pseudomonadota.c__Gammaproteobacteria.o__Pseudomonadales_A_650611.f__Pseudomonadaceae.g__Pseudomonas_E_647464.s__Pseudomonas_E_647464.paraversuta	FM5 vs FM3	-3.11383	0.924343	45	17	0.00174229	0.0390792
d__Bacteria.p__Bacteroidota.c__Bacteroidia.o__Bacteroidales.f__Bacteroidaceae.g__Bacteroides_H_857956.s__Bacteroides_H_857956.faecichinchillae	FM5 vs FM3	-3.24323	0.958148	45	44	0.00166535	0.0390792
d__Bacteria.p__Bacteroidota.c__Bacteroidia.o__Bacteroidales.f__Muribaculaceae.g__Muribaculum.s__Muribaculum.intestinale	FM5 vs FM3	-3.43848	1.29929	45	23	0.0117709	0.124771
d__Bacteria.p__Bacillota_A_368345.c__Clostridia_258483.o__Peptostreptococcales.f__Anaerovoracaceae.g__Hominibacterium.s__Hominibacterium.faecale	FM5 vs FM3	-3.50475	1.60235	45	28	0.0349472	0.21934
d__Bacteria.p__Bacillota_A_368345.c__Clostridia_258483.o__Oscillospirales.f__CAG.272.g__RUG13077.s__	FM5 vs FM3	-3.53619	0.908995	45	17	0.000390565	0.0155249
d__Bacteria.p__Bacillota_A_368345.c__Clostridia_258483.o__Oscillospirales.f__Ruminococcaceae.g__Ruminiclostridium_E.s__Ruminiclostridium_E.siraeum	FM5 vs FM3	-3.6064	1.70289	45	11	0.0407907	0.237199
d__Bacteria.p__Bacillota_A_368345.c__Clostridia_258483.o__Lachnospirales.f__Lachnospiraceae.g__Otoolea_134526.s__	FM5 vs FM3	-3.76363	1.64765	45	22	0.0280321	0.199572
d__Bacteria.p__Bacteroidota.c__Bacteroidia.o__Bacteroidales.f__Muribaculaceae.g__UBA7173.s__UBA7173.sp002491305	FM5 vs FM3	-4.4817	1.85438	45	23	0.0205659	0.175114
d__Bacteria.p__Bacillota_I.c__Bacilli_A.o__Lactobacillales.f__Streptococcaceae.g__Streptococcus.s__Streptococcus.gallolyticus	FM5 vs FM3	-5.1694	1.27922	45	22	0.000249945	0.0108385
d__Bacteria.p__Bacteroidota.c__Bacteroidia.o__Bacteroidales.f__Bacteroidaceae.g__Bacteroides_H_857956.s__Bacteroides_H_857956.cellulosilyticus	FM5 vs FM3	-6.75079	2.02801	45	24	0.00194676	0.0415185
d__Bacteria.p__Bacillota_A_368345.c__Clostridia_258483.o__Oscillospirales.f__Ruminococcaceae.g__.s__	FM5 vs FM3	-9.41222	2.39297	45	31	0.000344024	0.0142695
