# Supplementary material for: Prevention of colorectal cancer and modulation of murine gut microbiota using functional meats
Source: Royal Society of Chemistry journal article supplement (doi:10.1039/d5fo04442a), 2026-01-01
Supplement: d5fo04442a7.xlsx [file d5fo04442a7.xlsx]

## Sheet: Hoja1
feature	value	coef	stderr	N	N.not.0	pval	qval
d__Bacteria.p__Bacillota_A_368345.c__Clostridia_258483.o__Oscillospirales.f__Acutalibacteraceae.g__Eubacterium_R.s__Eubacterium_R.sp000436835	FM5 vs FM4	5.64095	1.58082	45	19	0.000992338	0.0278438
d__Bacteria.p__Bacillota_A_368345.c__Clostridia_258483.o__Oscillospirales.f__Ruminococcaceae.g__Anaerotruncus.s__Anaerotruncus.sp000403395	FM5 vs FM4	4.04849	1.26845	45	19	0.00283713	0.0510683
d__Bacteria.p__Bacillota_B_370539.c__Dehalobacteriia.o__Dehalobacteriales.f__Dehalobacteriaceae.g__.s__	FM5 vs FM4	3.79733	1.35528	45	27	0.00795045	0.0985211
d__Bacteria.p__Bacillota_A_368345.c__Clostridia_258483.o__Oscillospirales.f__Ruminococcaceae.g__Massilioclostridium.s__Massilioclostridium.methylpentosum	FM5 vs FM4	3.03216	0.803644	45	24	0.000550315	0.0194444
d__Bacteria.p__Bacillota_A_368345.c__Clostridia_258483.o__Oscillospirales.f__Oscillospiraceae_88309.g__Dysosmobacter.s__Dysosmobacter.sp000403435	FM5 vs FM4	2.8591	1.34738	45	44	0.0404182	0.236558
d__Bacteria.p__Bacillota_A_368345.c__Clostridia_258483.o__Oscillospirales.f__Oscillospiraceae_88309.g__Lawsonibacter.s__Lawsonibacter.sp000492175	FM5 vs FM4	2.78027	1.15828	45	45	0.0213835	0.175114
d__Bacteria.p__Bacillota_A_368345.c__Clostridia_258483.o__Peptostreptococcales.f__Anaerovoracaceae.g__Emergencia.s__Emergencia.timonensis	FM5 vs FM4	2.73337	1.20517	45	22	0.0290948	0.202419
d__Bacteria.p__Bacillota_A_368345.c__Clostridia_258483.o__Lachnospirales.f__Lachnospiraceae.g__Schaedlerella.s__Schaedlerella.sp000403295	FM5 vs FM4	2.69692	1.1512	45	14	0.0244822	0.182469
d__Bacteria.p__Bacillota_A_368345.c__Clostridia_258483.o__Lachnospirales.f__Lachnospiraceae.g__Choladousia.s__Choladousia.sp003612585	FM5 vs FM4	2.02868	0.959503	45	33	0.0411077	0.237199
d__Bacteria.p__Bacteroidota.c__Bacteroidia.o__Bacteroidales.f__Tannerellaceae.g__Parabacteroides_B_862066.s__Parabacteroides_B_862066.goldsteinii	FM5 vs FM4	1.15281	0.522539	45	45	0.0334905	0.214968
d__Bacteria.p__Actinomycetota.c__Actinomycetes.o__Actinomycetales.f__Bifidobacteriaceae.g__Bifidobacterium_388775.s__Bifidobacterium.globosum	FM5 vs FM4	-2.21695	0.725488	45	11	0.00409214	0.0661678
d__Bacteria.p__Bacteroidota.c__Bacteroidia.o__Bacteroidales.f__Bacteroidaceae.g__Bacteroides_H_857956.s__Bacteroides_H_857956.faecichinchillae	FM5 vs FM4	-2.6768	0.958148	45	44	0.00811794	0.0992887
d__Bacteria.p__Verrucomicrobiota.c__Verrucomicrobiae.o__Verrucomicrobiales.f__Akkermansiaceae.g__Akkermansia.s__Akkermansia.muciniphila_D_776786	FM5 vs FM4	-3.32008	1.54508	45	44	0.0380838	0.232897
d__Bacteria.p__Bacillota_A_368345.c__Clostridia_258483.o__Peptostreptococcales.f__Peptostreptococcaceae_256921.g__Clostridioides_A.s__Clostridioides_A.difficile	FM5 vs FM4	-3.42093	1.60276	45	15	0.0393214	0.2333
d__Bacteria.p__Bacillota_A_368345.c__Clostridia_258483.o__Oscillospirales.f__Ruminococcaceae.g__Ruminiclostridium_E.s__Ruminiclostridium_E.siraeum	FM5 vs FM4	-3.59266	1.70289	45	11	0.0415222	0.237199
d__Bacteria.p__Bacillota_I.c__Bacilli_A.o__MOL361.f__Turicibacteraceae.g__Turicibacter.s__Turicibacter.bilis	FM5 vs FM4	-3.84052	1.03328	45	20	0.000647804	0.0213105
d__Bacteria.p__Bacillota_I.c__Bacilli_A.o__Lactobacillales.f__Streptococcaceae.g__Streptococcus.s__Streptococcus.gallolyticus	FM5 vs FM4	-7.29836	1.27922	45	22	1.44414e-06	0.000459238
