# Supplementary material for: Prevention of colorectal cancer and modulation of murine gut microbiota using functional meats
Source: Royal Society of Chemistry journal article supplement (doi:10.1039/d5fo04442a), 2026-01-01
Supplement: d5fo04442a8.xlsx [file d5fo04442a8.xlsx]

## Sheet: Hoja1
feature	value	coef	stderr	N	N.not.0	pval	qval
d__Bacteria.p__Bacillota_A_368345.c__Clostridia_258483.o__Oscillospirales.f__Ruminococcaceae.g__.s__	FM1 vs CM	8.37249	2.69592	45	31	0.00358098	0.050239
d__Bacteria.p__Bacillota_A_368345.c__Clostridia_258483.o__Lachnospirales.f__Lachnospiraceae.g__Roseburia_A_166204.s__Roseburia_A_166204.intestinalis	FM1 vs CM	6.6464	1.96731	45	28	0.00169571	0.0323995
d__Bacteria.p__Bacillota_I.c__Bacilli_A.o__Lactobacillales.f__Streptococcaceae.g__Streptococcus.s__Streptococcus.gallolyticus	FM1 vs CM	6.13389	1.44117	45	22	0.000131102	0.00463227
d__Bacteria.p__Pseudomonadota.c__Gammaproteobacteria.o__Pseudomonadales_A_650611.f__Pseudomonadaceae.g__Pseudomonas_B_650326.s__Pseudomonas_B_650326.paraeruginosa	FM1 vs CM	5.82101	2.5463	45	24	0.0279149	0.166443
d__Bacteria.p__Pseudomonadota.c__Gammaproteobacteria.o__Enterobacterales_737866.f__Enterobacteriaceae_A_725029.g__Escherichia.s__	FM1 vs CM	4.93722	2.21783	45	42	0.0320106	0.183455
d__Bacteria.p__Actinomycetota.c__Actinomycetes.o__Actinomycetales.f__Bifidobacteriaceae.g__Bifidobacterium_388775.s__Bifidobacterium.animalis	FM1 vs CM	4.91059	1.29391	45	18	0.000515929	0.0123931
d__Bacteria.p__Bacillota_A_368345.c__Clostridia_258483.o__Oscillospirales.f__Oscillospiraceae_88309.g__Limivicinus.s__Limivicinus.sp002320035	FM1 vs CM	4.48447	1.86373	45	42	0.0210911	0.144518
d__Bacteria.p__Bacteroidota.c__Bacteroidia.o__Bacteroidales.f__Bacteroidaceae.g__Bacteroides_H_857956.s__Bacteroides_H_857956.faecichinchillae	FM1 vs CM	4.38032	1.07945	45	44	0.000237715	0.0073155
d__Bacteria.p__Bacillota_A_368345.c__Clostridia_258483.o__Oscillospirales.f__Ruminococcaceae.g__Massilioclostridium.s__	FM1 vs CM	4.23198	1.50442	45	33	0.00772647	0.07759
d__Bacteria.p__Bacillota_A_368345.c__Clostridia_258483.o__Oscillospirales.f__Acutalibacteraceae.g__UBA5905.s__	FM1 vs CM	3.6757	1.36538	45	35	0.0105022	0.096564
d__Bacteria.p__Bacillota_A_368345.c__Clostridia_258483.o__Lachnospirales.f__Lachnospiraceae.g__Eisenbergiella.s__Eisenbergiella.porci	FM1 vs CM	3.51529	1.70831	45	36	0.046521	0.225561
d__Bacteria.p__Bacillota_A_368345.c__Clostridia_258483.o__Oscillospirales.f__CAG.272.g__RUG13077.s__	FM1 vs CM	3.35881	1.02408	45	17	0.00222856	0.0383711
d__Bacteria.p__Bacteroidota.c__Bacteroidia.o__Bacteroidales.f__Muribaculaceae.g__Lepagella.s__Lepagella.muris_A	FM1 vs CM	3.13256	1.43057	45	13	0.0347541	0.189459
d__Bacteria.p__Bacteroidota.c__Bacteroidia.o__Bacteroidales.f__Bacteroidaceae.g__Phocaeicola_A.s__Phocaeicola_A.vulgatus	FM1 vs CM	2.86395	0.901814	45	44	0.00296257	0.0434814
d__Bacteria.p__Pseudomonadota.c__Alphaproteobacteria.o__Rs.D84_512864.f__Rs.D84.g__.s__	FM1 vs CM	2.77046	1.11498	45	17	0.0174847	0.131341
d__Bacteria.p__Bacillota_A_368345.c__Clostridia_258483.o__Lachnospirales.f__Lachnospiraceae.g__Roseburia_A_166204.s__Roseburia_A_166204.cecicola	FM1 vs CM	2.56501	1.00737	45	18	0.0150648	0.119616
d__Bacteria.p__Actinomycetota.c__Actinomycetes.o__Actinomycetales.f__Bifidobacteriaceae.g__Bifidobacterium_388775.s__Bifidobacterium.globosum	FM1 vs CM	2.24382	0.817336	45	11	0.00918332	0.0891024
d__Bacteria.p__Bacteroidota.c__Bacteroidia.o__Bacteroidales.f__Muribaculaceae.g__Duncaniella.s__Duncaniella.muris	FM1 vs CM	2.17157	0.927634	45	33	0.0245808	0.156334
d__Bacteria.p__Bacteroidota.c__Bacteroidia.o__Bacteroidales.f__Bacteroidaceae.g__Bacteroides_H_857956.s__Bacteroides_H_857956.uniformis	FM1 vs CM	1.65264	0.807185	45	45	0.0475767	0.226941
d__Bacteria.p__Bacillota_A_368345.c__Clostridia_258483.o__Lachnospirales.f__Lachnospiraceae.g__Brotaphodocola.s__Brotaphodocola.sp003481825	FM1 vs CM	1.51228	0.75541	45	9	0.0524686	0.238802
d__Bacteria.p__Bacillota_A_368345.c__Clostridia_258483.o__Lachnospirales.f__Lachnospiraceae.g__Muricomes_149720.s__	FM1 vs CM	-1.79367	0.627846	45	5	0.00690166	0.0739796
d__Bacteria.p__Bacillota_A_368345.c__Clostridia_258483.o__Lachnospirales.f__Lachnospiraceae.g__UBA9414.s__	FM1 vs CM	-2.32075	1.09673	45	7	0.0409475	0.208898
d__Bacteria.p__Bacillota_A_368345.c__Clostridia_258483.o__Lachnospirales.f__Lachnospiraceae.g__Faecalimonas.s__Faecalimonas.umbilicata	FM1 vs CM	-2.32446	0.221264	45	4	8.52036e-13	8.12842e-10
d__Bacteria.p__Bacillota_A_368345.c__Clostridia_258483.o__Peptostreptococcales.f__Peptostreptococcaceae_256921.g__Faecalimicrobium.s__Faecalimicrobium.dakarense	FM1 vs CM	-2.52253	1.0551	45	7	0.0218711	0.145909
d__Bacteria.p__Bacillota_I.c__Bacilli_A.o__Erysipelotrichales.f__Erysipelotrichaceae.g__Holdemania.s__Holdemania.sp900120005	FM1 vs CM	-2.52695	0.465373	45	6	3.44335e-06	0.00041062
d__Bacteria.p__Bacillota_A_368345.c__Clostridia_258483.o__UBA1381.f__UBA1381.g__Hominilimicola.s__Hominilimicola.sp001941225	FM1 vs CM	-2.55686	1.18234	45	26	0.0369355	0.197958
d__Bacteria.p__Bacillota_A_368345.c__Clostridia_258483.o__Christensenellales.f__Christensenellaceae.g__Christensenella.s__	FM1 vs CM	-2.82459	1.26964	45	41	0.0321142	0.183455
d__Bacteria.p__Bacillota_A_368345.c__Clostridia_258483.o__Clostridiales.f__Clostridiaceae_222000.g__Clostridium_T.s__Clostridium_T.celatum	FM1 vs CM	-2.8907	1.42618	45	10	0.0497338	0.231444
d__Bacteria.p__Cyanobacteriota.c__Vampirovibrionia.o__Gastranaerophilales.f__Gastranaerophilaceae.g__CAG.196.s__CAG.196.sp002102975	FM1 vs CM	-3.52417	1.08789	45	8	0.00249008	0.0396377
d__Bacteria.p__Bacillota_A_368345.c__Clostridia_258483.o__Oscillospirales.f__Butyricicoccaceae.g__Agathobaculum.s__Agathobaculum.ammoniilyticum	FM1 vs CM	-3.68868	1.41728	45	21	0.0131185	0.110753
d__Bacteria.p__Bacillota_A_368345.c__Clostridia_258483.o__Oscillospirales.f__Oscillospiraceae_88309.g__Intestinimonas.s__Intestinimonas.butyriciproducens	FM1 vs CM	-4.01358	1.47239	45	38	0.00964483	0.0902522
d__Bacteria.p__Bacillota_A_368345.c__Clostridia_258483.o__Lachnospirales.f__Lachnospiraceae.g__Mediterraneibacter_A_155507.s__Mediterraneibacter_A_155507.torques	FM1 vs CM	-4.13065	1.43154	45	6	0.00640888	0.0719303
d__Bacteria.p__Bacillota_I.c__Bacilli_A.o__Lactobacillales.f__Lactobacillaceae.g__Lactobacillus.s__Lactobacillus.johnsonii	FM1 vs CM	-4.36673	1.65237	45	26	0.0118802	0.103531
d__Bacteria.p__Bacillota_A_368345.c__Clostridia_258483.o__Lachnospirales.f__Lachnospiraceae.g__Kineothrix.s__Kineothrix.sp000403275	FM1 vs CM	-4.55826	1.87082	45	34	0.0196256	0.138688
d__Bacteria.p__Bacillota_A_368345.c__Clostridia_258483.o__Oscillospirales.f__Acutalibacteraceae.g__Eubacterium_R.s__Eubacterium_R.sp000436835	FM1 vs CM	-4.5728	1.78095	45	19	0.0142982	0.116585
d__Bacteria.p__Bacillota_A_368345.c__Clostridia_258483.o__Oscillospirales.f__Ruminococcaceae.g__Massiliimalia.s__Massiliimalia.timonensis	FM1 vs CM	-4.601	1.17315	45	27	0.000355737	0.00998157
d__Bacteria.p__Bacillota_I.c__Bacilli_A.o__Erysipelotrichales.f__Erysipelotrichaceae.g__Dielma.s__Dielma.fastidiosa	FM1 vs CM	-4.69269	0.903654	45	10	7.2543e-06	0.000629146
d__Bacteria.p__Bacillota_A_368345.c__Clostridia_258483.o__Lachnospirales.f__Lachnospiraceae.g__MD308.s__MD308.sp000403475	FM1 vs CM	-4.77675	1.22194	45	20	0.000369398	0.0100687
d__Bacteria.p__Bacillota_A_368345.c__Clostridia_258483.o__Clostridiales.f__Clostridiaceae_222000.g__Sarcina_200052.s__	FM1 vs CM	-5.08495	1.27895	45	8	0.000303323	0.00904282
d__Bacteria.p__Bacillota_A_368345.c__Clostridia_258483.o__Peptostreptococcales.f__Peptostreptococcaceae_256921.g__Romboutsia_B.s__Romboutsia_B.maritimum	FM1 vs CM	-5.32714	1.84039	45	30	0.0062588	0.0719303
d__Bacteria.p__Bacillota_A_368345.c__Clostridia_258483.o__Peptostreptococcales.f__Anaerovoracaceae.g__Emergencia.s__Emergencia.timonensis	FM1 vs CM	-6.77323	1.35775	45	22	1.37582e-05	0.000937525
d__Bacteria.p__Bacillota_A_368345.c__Clostridia_258483.o__Oscillospirales.f__Oscillospiraceae_88309.g__.s__	FM1 vs CM	-6.87724	2.42759	45	33	0.00734089	0.0745022
d__Bacteria.p__Bacillota_A_368345.c__Clostridia_258483.o__Oscillospirales.f__Ruminococcaceae.g__Anaerotruncus.s__Anaerotruncus.sp000403395	FM1 vs CM	-6.98489	1.42904	45	19	1.88365e-05	0.00110148
d__Bacteria.p__Bacillota_A_368345.c__Clostridia_258483.o__TANB77.f__CAG.508.g__.s__	FM1 vs CM	-7.00084	1.46365	45	20	2.60762e-05	0.00138204
d__Bacteria.p__Bacillota_A_368345.c__Clostridia_258483.o__Lachnospirales.f__Lachnospiraceae.g__Suilimivivens.s__Suilimivivens.sp000403495	FM1 vs CM	-9.61376	2.70848	45	25	0.00104712	0.0227036
