# Supplementary material for: Prevention of colorectal cancer and modulation of murine gut microbiota using functional meats
Source: Royal Society of Chemistry journal article supplement (doi:10.1039/d5fo04442a), 2026-01-01
Supplement: d5fo04442a9.xlsx [file d5fo04442a9.xlsx]

## Sheet: raw_morphometric_and_metadata
sample_name	Group	Body_weight	Relative_cecum_weight	Peyers_patches	Tumors	Tumoral_area
A1A1	C	175.7	0.00910643	11	41	247.01
A1A2	C	315.45	0.0107149	10	29	449.64
A1A3	C	198.1	0.011055	11	50	541.93
A1A4	C	269.1	0.00843553	9	39	565.1
A1A5	C	304.91	0.0107901	14	27	212.84
A1A7	C	270.35	0.00632513	10	27	517.19
A1A8	C	301.7	0.0124296	9	26	244.26
A3A1	CM	213	0.0102817	13	37	1219.14
A3A5	CM	257.64	0.011877	8	16	267.04
A3A6	CM	269.2	0.0122957	10	44	353.43
A3A7	CM	191.42	0.00856755	11	29	506.58
A4A1	FM1	264.8	0.0283233	7	22	168.67
A4A2	FM1	268	0.0213433	5	15	205.38
A4A3	FM1	257.4	0.0244755	6	13	151.65
A4A5	FM1	263.4	0.0259301	6	16	205.77
A4A6	FM1	222.6	0.0228661	6	18	120.95
A4A7	FM1	245.9	0.0259048	8	23	171.02
A4A8	FM1	251.5	0.0221471	7	32	118.99
A5A1	FM2	275.1	0.0123591	8	36	558.223
A5A2	FM2	254.8	0.00973312	7	29	395.842
A5A4	FM2	279.9	0.0096463	6	31	340.275
A5A5	FM2	277.8	0.0100072	5	40	346.361
A5A6	FM2	259.3	0.0141149	7	35	451.212
A5A7	FM2	261.8	0.015508	9	58	391.718
A5A8	FM2	258.3	0.013976	7	38	433.344
A6A1	FM3	251.1	0.0302668	10	34	434.523
A6A2	FM3	258.9	0.025956	8	37	339.096
A6A3	FM3	261.7	0.0389759	7	25	161.989
A6A4	FM3	254.8	0.0157771	7	38	388.969
A6A5	FM3	259.4	0.0294526	8	31	360.499
A6A6	FM3	249	0.0353414	6	29	522.938
A6A8	FM3	241.5	0.0238095	11	60	455.336
A7A1	FM4	222.2	0.0229523	4	37	310.037
A7A2	FM4	262.1	0.0204121	5	39	453.765
A7A3	FM4	253	0.0163241	6	47	387.595
A7A4	FM4	181.1	0.0140254	4	22	249.757
A7A5	FM4	260.6	0.0259785	5	22	264.091
A7A6	FM4	239.1	0.00786282	5	47	682.709
A7A8	FM4	219.1	0.0122319	6	42	492.642
A8A1	FM5	262.2	0.00991609	6	24	341.453
A8A2	FM5	267.6	0.0113229	5	48	347.805
A8A3	FM5	253.4	0.0105762	5	31	358.928
A8A4	FM5	276	0.0128986	4	30	214.218
A8A6	FM5	228.4	0.00901926	5	42	634.603
A8A7	FM5	270.5	0.00924214	4	27	201.848
