# Supplementary material for: Prevention of colorectal cancer and modulation of murine gut microbiota using functional meats
Source: Royal Society of Chemistry journal article supplement (doi:10.1039/d5fo04442a), 2026-01-01
Supplement: d5fo04442a10.xlsx [file d5fo04442a10.xlsx]

## Sheet: raw_taxon_abundance
Feature_ID	A1A1	A1A2	A1A3	A1A4	A1A5	A1A7	A1A8	A3A1	A3A5	A3A6	A3A7	A4A1	A4A2	A4A3	A4A5	A4A6	A4A7	A4A8	A5A1	A5A2	A5A4	A5A5	A5A6	A5A7	A5A8	A6A1	A6A2	A6A3	A6A4	A6A5	A6A6	A6A8	A7A1	A7A2	A7A3	A7A4	A7A5	A7A6	A7A8	A8A1	A8A2	A8A3	A8A4	A8A6	A8A7
d__Bacteria;p__Bacillota_A_368345;c__Clostridia_258483;o__Lachnospirales;f__Lachnospiraceae;g__1XD8-76;s__1XD8-76 sp003611955	0	17533	5741	1502	187	2840	10784	0	0	9144	0	20642	48	0	129	0	0	56	25223	121	8037	373	169	4180	27	7216	14470	11642	7551	46	733	19951	65	265	3080	11	12587	1518	0	12	25114	25898	12066	15249	37
d__Bacteria;p__Bacteroidota;c__Bacteroidia;o__Bacteroidales;f__Bacteroidaceae;g__Phocaeicola_A;s__Phocaeicola_A vulgatus	0	1049	1319	3103	2836	275	238	2524	161	661	5058	2032	13130	35478	5655	6824	10640	7098	2115	6751	5227	7947	961	11077	2748	2799	2902	2685	11112	3799	6489	3389	14185	3004	2573	19999	1602	1411	16686	1825	3892	222	3120	867	5324
d__Bacteria;p__Bacteroidota;c__Bacteroidia;o__Bacteroidales;f__Tannerellaceae;g__Parabacteroides_B_862066;s__Parabacteroides_B_862066 distasonis	4764	15251	12847	13138	10500	747	3723	16457	7828	4308	21751	1725	8628	8499	5443	5194	8111	8094	2777	17200	10885	3754	3920	9117	8686	1499	1239	1983	8670	5477	1162	4427	3091	6544	3343	15840	1110	8511	9607	6829	5485	5330	3101	8356	18310
d__Bacteria;p__Pseudomonadota;c__Gammaproteobacteria;o__Enterobacterales_737866;f__Enterobacteriaceae_A_725029;g__Escherichia;s__	39509	24	8432	6335	4	1323	175	776	0	0	4973	46	44	7217	5184	22214	14307	8590	1449	8502	178	796	21057	977	1962	119	186	0	568	4	21	1031	8695	1206	18535	9215	13	16830	9046	1668	464	65	31	449	2861
d__Bacteria;p__Bacteroidota;c__Bacteroidia;o__Bacteroidales;f__Bacteroidaceae;g__Bacteroides_H_857956;s__Bacteroides_H_857956 uniformis	1326	2062	23601	12912	1197	1245	1359	1810	2373	321	4218	3500	2314	4456	6100	11905	7551	4976	4994	4312	6994	11976	1790	6600	3218	202	2660	810	6270	1562	1160	15607	2381	11877	2056	4000	901	8507	7848	4519	8462	3196	1590	1810	8500
d__Bacteria;p__Bacteroidota;c__Bacteroidia;o__Bacteroidales;f__Tannerellaceae;g__Parabacteroides_B_862066;s__Parabacteroides_B_862066 goldsteinii	1562	1769	1492	2804	7085	940	754	9720	5797	1657	10132	1699	3096	1246	3349	2533	6507	2617	2052	11258	3566	2234	1890	10165	6819	1905	926	3602	1575	1302	1023	1087	1688	1298	636	2335	264	4082	6814	4512	1897	2766	2809	2333	5593
d__Bacteria;p__Bacteroidota;c__Bacteroidia;o__Bacteroidales;f__Bacteroidaceae;g__Bacteroides_H_857956;s__Bacteroides_H_857956 xylanisolvens	14324	2924	2130	4150	3214	228	1125	1962	1175	1985	9229	1349	9501	6366	7014	7465	7200	4165	1213	14941	785	16674	1321	6551	2986	533	0	90	5812	0	320	792	5308	1335	396	28126	363	6914	3744	3040	857	4757	1243	1022	17603
d__Bacteria;p__Bacillota_A_368345;c__Clostridia_258483;o__Oscillospirales;f__Oscillospiraceae_88309;g__Lawsonibacter;s__Lawsonibacter sp000492175	80	1958	817	3537	8970	2859	5064	4301	10600	5949	983	1670	5379	498	724	1371	120	765	880	1361	1987	12572	1207	7294	3170	7087	3062	5050	3398	4285	7249	1660	875	2285	643	11	5220	1577	1207	6906	2986	1294	13399	10238	2526
d__Bacteria;p__Bacillota_A_368345;c__Clostridia_258483;o__Lachnospirales;f__Lachnospiraceae;g__Enterocloster;s__Enterocloster clostridioformis	2030	64	386	0	28	0	2	1255	529	470	398	12	936	1577	4767	6076	1064	1812	3231	2889	3705	561	12469	1753	8680	0	0	0	4924	0	0	1349	6422	2219	4249	3357	22	2657	1109	7827	2555	9332	86	2377	5720
d__Bacteria;p__Bacillota_A_368345;c__Clostridia_258483;o__Oscillospirales;f__Oscillospiraceae_88309;g__Lawsonibacter;s__	943	49	1762	1056	388	218	3	1176	142	291	2914	32	159	1754	2100	5502	1833	2289	1356	2843	6124	2725	1824	1584	8844	0	127	0	2267	903	7	1145	4708	1993	3355	1860	103	7406	6053	5126	5256	5790	200	3590	4810
d__Bacteria;p__Bacillota_A_368345;c__Clostridia_258483;o__Oscillospirales;f__Ruminococcaceae;g__;s__	0	0	0	129	2428	563	0	0	0	0	0	0	10522	7	1937	4023	2485	2428	9	0	2983	17	5	7	8	4416	9309	9818	11532	34	11951	6559	17	4706	413	7	4603	1418	0	0	0	0	6	4175	3
d__Bacteria;p__Desulfobacterota_G_459543;c__Desulfovibrionia;o__Desulfovibrionales;f__Desulfovibrionaceae;g__Bilophila;s__Bilophila wadsworthia	3338	2318	1389	6151	1131	1456	279	4029	2818	3019	6334	1066	1045	1069	2425	3731	1660	2354	889	2986	2085	2793	1475	971	4447	40	83	18	3213	108	0	725	4321	2615	1404	2623	1575	1463	2903	2093	1775	2067	549	1052	709
d__Bacteria;p__Bacteroidota;c__Bacteroidia;o__Bacteroidales;f__Bacteroidaceae;g__Bacteroides_H_857956;s__Bacteroides_H_857956 faecichinchillae	46	87	90	168	9	76	31	0	992	259	4212	5582	4276	16413	8595	555	26771	12202	2817	11928	2006	8046	1035	5019	4141	7184	3619	4775	8331	4979	4268	6472	9440	13647	2057	3910	6032	2632	9675	4845	2034	701	491	611	96
d__Bacteria;p__Pseudomonadota;c__Gammaproteobacteria;o__Burkholderiales;f__Burkholderiaceae_A_595427;g__Parasutterella_564865;s__Parasutterella excrementihominis	312	444	380	358	44	193	21	2331	741	537	4631	300	964	6677	10031	2258	3723	2771	389	5112	402	4464	911	2431	850	644	130	41	5855	2445	371	896	4980	1602	13672	3493	857	5471	2273	3516	1449	1005	1306	1325	8112
d__Bacteria;p__Bacteroidota;c__Bacteroidia;o__Bacteroidales;f__Bacteroidaceae;g__Bacteroides_H_857956;s__Bacteroides_H_857956 thetaiotaomicron	2688	742	660	818	1939	767	518	1763	861	461	1423	213	693	11184	2532	543	3886	5495	2657	9860	8045	4937	726	2897	3657	628	508	872	1958	681	2276	1332	6153	1526	465	3051	60	2544	11806	7623	4485	2185	645	1074	4691
d__Bacteria;p__Bacillota_A_368345;c__Clostridia_258483;o__Lachnospirales;f__Lachnospiraceae;g__Suilimivivens;s__	0	730	0	14	465	524	5409	0	528	0	0	1039	3054	2	0	0	2	0	94	0	704	412	7	2831	14	8761	2686	7022	113	7968	2327	26	0	0	0	0	5304	0	0	1238	0	0	2308	826	0
d__Bacteria;p__Verrucomicrobiota;c__Verrucomicrobiae;o__Verrucomicrobiales;f__Akkermansiaceae;g__Akkermansia;s__Akkermansia muciniphila_D_776786	1261	17	23	289	5	20	0	40965	43	6	7	255	86	19	2611	1030	224	430	17	24	6	251	74	12	58	267	44	9	294	227	10	34	798	219	253	1192	42	97	468	105	7	261	15	31	2
d__Bacteria;p__Bacillota_A_368345;c__Clostridia_258483;o__Lachnospirales;f__Lachnospiraceae;g__Suilimivivens;s__Suilimivivens sp000403495	9	0	0	0	0	12026	17	1186	20186	1341	1745	0	172	0	0	9	9	0	0	0	0	0	3660	28	0	90	0	1344	0	20	1274	0	34	54	0	3	0	3051	8	1003	151	0	0	8	1457
d__Bacteria;p__Bacillota_A_368345;c__Clostridia_258483;o__Lachnospirales;f__Lachnospiraceae;g__Dorea_A;s__	333	2209	1676	5845	884	1859	111	1067	440	1256	256	137	0	963	1172	542	520	430	1192	873	531	760	1058	1079	2336	0	13	0	510	0	0	199	337	660	2422	235	23	2043	842	787	858	2522	102	523	1272
d__Bacteria;p__Bacillota_A_368345;c__Clostridia_258483;o__Lachnospirales;f__Lachnospiraceae;g__Otoolea_134252;s__Otoolea symbiosa	6715	124	637	326	33	58	0	134	552	89	314	0	0	454	1002	3083	761	789	249	2547	635	68	748	78	2209	0	0	0	501	0	0	108	1978	442	3140	3809	4	1037	890	786	460	2240	30	154	1351
d__Bacteria;p__Bacteroidota;c__Bacteroidia;o__Bacteroidales;f__Bacteroidaceae;g__Bacteroides_H_857956;s__Bacteroides_H_857956 cellulosilyticus	0	0	0	0	0	0	0	0	0	39	0	214	6687	11	3	0	0	0	11	2	9	14591	7	1110	9	1957	272	718	3720	1194	1207	574	0	0	136	0	0	7	0	0	0	2415	224	17	0
d__Bacteria;p__Bacillota_I;c__Bacilli_A;o__Erysipelotrichales;f__Erysipelotrichaceae;g__Longicatena;s__Longicatena caecimuris	0	0	0	0	0	426	0	290	3161	224	374	12	562	3445	2703	1704	1127	1097	523	5473	193	1123	1582	1731	1828	0	0	2	1068	79	0	406	1813	273	2797	145	12	638	1328	1134	1684	785	83	34	1304
d__Bacteria;p__Bacillota_A_368345;c__Clostridia_258483;o__Oscillospirales;f__Ruminococcaceae;g__Ruthenibacterium;s__Ruthenibacterium lactatiformans	1134	214	1036	708	21	37	0	184	94	9	241	25	32	421	1596	595	326	2954	4045	2436	3698	786	329	462	2174	17	3	0	1446	0	18	525	134	1244	2264	204	67	1646	428	604	5490	9057	171	83	527
d__Bacteria;p__Bacteroidota;c__Bacteroidia;o__Bacteroidales;f__Bacteroidaceae;g__Bacteroides_H_857956;s__Bacteroides_H_857956 caecimuris	0	20	47	36	35	17	81	0	1779	159	0	2	22	2256	29	14	648	73	20	74	6	1232	255	286	399	15	11	10	859	27	23	43	4704	150	761	98	49	28	0	3501	0	268	13	162	8343
d__Bacteria;p__Bacillota_I;c__Bacilli_A;o__Lactobacillales;f__Lactobacillaceae;g__Ligilactobacillus;s__Ligilactobacillus apodemi	0	21	10	501	5	114	3	3219	35	10	47	55	29	3015	241	849	921	375	909	110	77	1232	20485	80	619	100	110	34	66	518	247	55	909	73	231	71	147	41	281	1546	305	454	65	38	89
d__Bacteria;p__Bacillota_A_368345;c__Clostridia_258483;o__Lachnospirales;f__Lachnospiraceae;g__Hungatella_A_128155;s__Hungatella_A_128155 effluvii	2545	49	447	0	0	0	0	283	370	25	410	0	0	258	476	1198	1071	459	74	306	163	50	524	80	858	0	0	0	6	0	0	0	1795	0	4920	2334	5	2501	400	395	128	788	7	143	496
d__Bacteria;p__Bacillota_A_368345;c__Clostridia_258483;o__Lachnospirales;f__Lachnospiraceae;g__Blautia_A_141781;s__Blautia_A_141781 caecimuris	0	7	379	0	0	0	0	112	434	0	719	12	575	0	1335	917	3086	1053	904	2932	413	1599	1678	953	3580	0	0	0	49	0	0	20	0	9	0	641	0	2303	0	0	0	1900	2	0	0
d__Bacteria;p__Bacillota_A_368345;c__Clostridia_258483;o__Lachnospirales;f__Lachnospiraceae;g__Eisenbergiella;s__Eisenbergiella porci	549	10	77	32	4	16	0	31	48	0	55	10	0	1103	1338	1354	880	868	761	1634	1001	496	1345	1903	2284	0	0	0	1013	0	0	164	1512	289	2303	1236	31	765	866	1155	732	1723	40	0	1281
d__Bacteria;p__Bacillota_I;c__Bacilli_A;o__Erysipelotrichales;f__Coprobacillaceae;g__Thomasclavelia;s__Thomasclavelia ramosa	552	341	482	3305	340	0	0	6	615	536	341	0	0	284	208	272	148	229	71	829	98	1391	1115	18	0	0	0	0	121	20	6	83	357	234	3001	1979	0	1976	28	310	411	990	6	50	461
d__Bacteria;p__Bacillota_A_368345;c__Clostridia_258483;o__Lachnospirales;f__Lachnospiraceae;g__Enterocloster;s__Enterocloster pacaense	1738	0	242	0	0	0	0	278	1084	101	319	0	22	2483	260	3579	429	1193	26	593	109	73	374	0	401	0	0	0	137	0	0	63	2497	195	2114	3069	0	3515	2051	135	283	1421	10	88	690
d__Bacteria;p__Pseudomonadota;c__Gammaproteobacteria;o__Pseudomonadales_A_650611;f__Pseudomonadaceae;g__Pseudomonas_B_650326;s__Pseudomonas_B_650326 paraeruginosa	26	0	0	73	0	0	0	0	0	0	0	8	9	2	2	225	1518	1746	185	220	0	0	9	0	46	0	4	0	76	5	0	124	3564	0	286	47	0	0	10557	0	1386	17	0	0	218
d__Bacteria;p__Bacillota_A_368345;c__Clostridia_258483;o__Lachnospirales;f__Lachnospiraceae;g__Coprococcus_A_121497;s__Coprococcus_A_121497 sp000154245	0	0	0	0	0	0	0	0	0	0	0	0	0	2	75	0	0	20	0	0	10532	46	17	1605	10	4	1216	5	0	0	1832	0	0	282	0	0	0	0	0	0	0	0	0	3611	0
d__Bacteria;p__Bacillota_A_368345;c__Clostridia_258483;o__Oscillospirales;f__Oscillospiraceae_88309;g__;s__	0	204	72	775	1118	1269	1310	1723	1115	2686	134	1026	267	0	0	0	12	0	11	0	12	12	0	213	10	2801	327	1767	11	57	527	0	0	5	2	0	55	178	0	5	45	0	139	1662	2
d__Bacteria;p__Bacillota_A_368345;c__Clostridia_258483;o__Lachnospirales;f__Lachnospiraceae;g__Ruminococcus_B;s__Ruminococcus_B gnavus	0	0	0	0	0	0	0	0	0	0	0	0	0	0	0	0	0	0	0	0	0	0	0	0	0	0	0	0	0	0	0	0	0	0	0	16915	0	3	0	9	0	0	0	0	0
d__Bacteria;p__Bacillota_A_368345;c__Clostridia_258483;o__Oscillospirales;f__Oscillospiraceae_88309;g__Limivicinus;s__Limivicinus sp002320035	48	159	379	3136	540	939	59	0	0	2091	103	740	859	84	923	1044	63	780	491	54	1072	313	1069	928	2239	109	406	128	795	668	226	530	392	881	895	2	418	922	233	152	948	338	313	413	0
d__Bacteria;p__Bacillota_A_368345;c__Clostridia_258483;o__Lachnospirales;f__Lachnospiraceae;g__Eubacterium_Q;s__	0	5613	0	825	1914	8002	0	0	0	0	0	0	0	0	0	0	0	0	0	0	0	2	0	0	0	0	0	0	0	0	0	0	0	0	0	0	0	0	0	0	0	0	0	0	0
d__Bacteria;p__Pseudomonadota;c__Gammaproteobacteria;o__Enterobacterales_737866;f__Enterobacteriaceae_A_732334;g__Proteus;s__Proteus mirabilis	8906	0	7	40	0	0	0	0	0	0	45	2	0	0	0	19	30	4	0	354	0	35	0	0	0	0	0	0	0	0	8	0	16	11	0	1524	0	0	0	7598	5	0	0	19	0
d__Bacteria;p__Bacillota_A_368345;c__Clostridia_258483;o__Lachnospirales;f__Lachnospiraceae;g__Enterocloster;s__Enterocloster asparagiformis	101	528	21	130	29	49	0	314	790	647	209	6	106	318	732	1955	143	539	392	135	228	233	644	477	827	8	0	0	572	0	65	129	679	248	367	160	28	184	197	428	192	1521	30	116	354
d__Bacteria;p__Bacillota_A_368345;c__Clostridia_258483;o__Oscillospirales;f__Oscillospiraceae_88309;g__Faecousia;s__Faecousia sp000434635	0	334	597	1666	3389	2952	1290	144	404	114	132	428	317	3	301	54	21	63	23	60	43	37	41	273	241	129	94	46	1478	215	55	1950	73	1784	316	9	117	174	66	133	170	180	114	249	226
d__Bacteria;p__Bacillota_A_368345;c__Clostridia_258483;o__Oscillospirales;f__Ruminococcaceae;g__Ruminococcus_C_59129;s__Ruminococcus_C_59129 flavefaciens_F	0	0	0	0	0	0	0	0	0	0	0	0	0	0	0	0	0	2	1694	0	344	5	5	0	0	120	0	0	0	0	0	2447	2	4524	0	0	105	175	0	0	1861	1693	47	662	0
d__Bacteria;p__Bacillota_A_368345;c__Clostridia_258483;o__Oscillospirales;f__Oscillospiraceae_88309;g__Dysosmobacter;s__Dysosmobacter sp000403435	3	300	248	245	956	884	1306	506	1529	871	86	451	1070	61	68	320	39	289	68	198	201	511	94	409	365	2416	848	463	383	1842	934	383	158	386	67	8	1207	473	0	379	320	1089	1460	848	142
d__Bacteria;p__Bacillota_A_368345;c__Clostridia_258483;o__Lachnospirales;f__Lachnospiraceae;g__Coprococcus_A_187866;s__Frisingicoccus caecimuris	1346	127	430	98	120	6	0	77	69	7	244	62	0	5954	260	165	1697	443	61	147	68	0	7	0	36	0	0	0	277	0	0	599	1188	173	261	424	22	766	368	52	133	136	0	52	102
d__Bacteria;p__Bacillota_A_368345;c__Clostridia_258483;o__Lachnospirales;f__Lachnospiraceae;g__Roseburia_A_166204;s__Roseburia_A_166204 intestinalis	0	0	0	0	0	0	0	0	0	0	0	250	1114	6	2235	0	1397	174	238	4	89	176	88	1173	11	128	192	580	541	0	332	683	0	356	947	0	526	0	48	111	30	85	197	108	0
d__Bacteria;p__Bacillota_A_368345;c__Clostridia_258483;o__Clostridiales;f__Clostridiaceae_222000;g__Clostridium_T;s__Clostridium_T celatum	60	2	501	592	22	5648	9	0	0	0	4602	0	0	0	0	0	0	0	0	0	0	0	0	0	0	0	0	0	0	0	0	5	0	0	0	10	0	0	0	0	0	0	0	0	0
d__Bacteria;p__Bacillota_A_368345;c__Clostridia_258483;o__Peptostreptococcales;f__Peptostreptococcaceae_256921;g__Romboutsia_B;s__Romboutsia_B maritimum	126	1802	170	1156	396	8817	518	1693	31	0	1447	0	0	0	2	0	143	0	116	217	0	535	824	0	103	6	0	0	0	0	0	0	571	112	3552	1182	24	244	63	202	34	305	120	213	0
d__Bacteria;p__Bacillota_A_368345;c__Clostridia_258483;o__Lachnospirales;f__Lachnospiraceae;g__Mediterraneibacter_A_155507;s__Mediterraneibacter_A_155507 torques	0	0	0	4643	5	1186	74	0	4168	0	310	0	0	0	0	0	0	0	0	0	0	0	0	0	0	0	0	0	0	0	0	0	0	0	0	0	0	0	0	0	0	0	0	0	0
d__Bacteria;p__Deferribacterota;c__Deferribacteres;o__Deferribacterales;f__Mucispirillaceae;g__Mucispirillum;s__Mucispirillum schaedleri	0	238	0	0	617	201	185	0	0	27	0	0	0	0	4	0	0	6	0	0	335	2162	0	350	4	0	0	0	0	0	60	0	0	697	0	0	243	0	0	2786	5	210	767	528	0
d__Bacteria;p__Bacillota_A_368345;c__Clostridia_258483;o__Lachnospirales;f__Lachnospiraceae;g__Otoolea_134526;s__	0	0	0	0	46	0	0	325	1731	920	0	412	1510	0	306	0	0	0	10	0	13	201	297	97	0	1454	636	1305	14	7	76	153	0	24	0	0	1086	0	0	0	0	0	800	0	0
d__Bacteria;p__Bacillota_I;c__Bacilli_A;o__Lactobacillales;f__Streptococcaceae;g__Streptococcus;s__Streptococcus gallolyticus	0	0	0	0	0	0	0	0	0	0	0	0	0	1867	165	50	686	315	0	2	0	0	0	0	0	22	44	8	288	263	62	193	849	153	1128	563	37	721	1707	0	0	23	0	59	0
d__Bacteria;p__Bacillota_A_368345;c__Clostridia_258483;o__Peptostreptococcales;f__Peptostreptococcaceae_256921;g__Clostridioides_A;s__Clostridioides_A difficile	8095	0	81	3	0	0	0	3	0	0	0	0	0	10	0	0	68	0	0	210	0	23	0	0	0	0	0	0	0	0	0	0	58	0	35	463	0	334	433	0	0	12	0	45	0
d__Bacteria;p__Bacillota_A_368345;c__Clostridia_258483;o__Oscillospirales;f__Acutalibacteraceae;g__Eubacterium_R;s__Eubacterium_R sp011958665	0	0	0	0	0	0	0	0	0	1758	0	0	329	0	0	0	0	392	795	0	2	0	5	0	2551	270	0	0	0	0	0	0	0	0	421	0	0	0	434	0	0	0	0	1123	0
d__Bacteria;p__Bacillota_A_368345;c__Clostridia_258483;o__Lachnospirales;f__Lachnospiraceae;g__UBA3282;s__UBA3282 sp003611805	0	0	0	0	261	0	0	21	72	0	2	0	2	0	5	0	9	0	26	0	10	15	35	10	5	40	0	0	0	0	0	0	6	56	7731	0	0	0	0	0	0	0	105	0	29
d__Bacteria;p__Bacillota_A_368345;c__Clostridia_258483;o__Oscillospirales;f__Oscillospiraceae_88309;g__Intestinimonas;s__Intestinimonas butyriciproducens	432	374	249	3733	233	75	5	453	139	131	583	5	60	20	16	5	25	38	8	9	28	0	0	31	26	0	9	0	52	43	34	55	16	41	0	4	45	10	370	0	86	6	17	0	236
d__Bacteria;p__Bacillota_I;c__Bacilli_A;o__Erysipelotrichales;f__Erysipelotrichaceae;g__Clostridium_AQ;s__Clostridium_AQ innocuum	357	1331	314	748	65	29	5	9	18	0	84	0	0	506	16	390	131	206	33	619	15	71	55	0	207	0	0	0	0	0	0	2	306	8	474	404	0	1011	369	133	38	216	0	3	14
d__Bacteria;p__Bacillota_A_368345;c__Clostridia_258483;o__Oscillospirales;f__Acutalibacteraceae;g__Eubacterium_R;s__Eubacterium_R sp000436835	0	19	0	178	0	295	0	215	1229	0	533	8	0	0	219	0	0	0	0	66	0	5	0	0	0	15	8	20	46	0	20	0	0	0	0	0	0	0	0	530	162	3799	0	0	902
d__Bacteria;p__Actinomycetota;c__Coriobacteriia;o__Coriobacteriales;f__Atopobiaceae;g__Granulimonas;s__	49	6	3304	11	2	39	0	157	0	0	53	16	2	38	458	80	194	96	102	4	11	68	0	8	182	0	0	0	145	0	0	63	39	44	716	2	4	191	374	0	71	0	0	245	33
d__Bacteria;p__Bacillota_A_368345;c__Clostridia_258483;o__Oscillospirales;f__Ruminococcaceae;g__Anaerotruncus;s__Anaerotruncus colihominis	59	14	71	21	12	8	8	86	108	18	135	6	0	78	33	193	25	99	3	120	90	25	58	3	19	42	8	3	46	0	0	24	142	96	151	11	43	488	799	97	73	2793	29	150	83
d__Bacteria;p__Bacteroidota;c__Bacteroidia;o__Bacteroidales;f__Muribaculaceae;g__Duncaniella;s__Duncaniella muris	0	0	0	0	0	0	0	0	387	112	0	634	676	148	219	124	165	226	67	185	114	241	23	244	119	41	105	119	403	168	108	169	130	498	55	0	181	203	0	69	0	166	67	68	45
d__Bacteria;p__Bacillota_A_368345;c__Clostridia_258483;o__Oscillospirales;f__Oscillospiraceae_88309;g__Enterenecus;s__Enterenecus sp004560375	587	274	147	1110	1893	229	448	0	982	2229	112	278	570	34	0	31	0	0	14	161	65	36	0	204	41	1560	1506	2896	113	945	558	64	434	140	8	0	508	32	0	366	121	0	648	638	0
d__Bacteria;p__Bacillota_A_368345;c__Clostridia_258483;o__Lachnospirales;f__Lachnospiraceae;g__Faecalimonas;s__Faecalimonas phoceensis	0	0	0	0	0	0	0	0	0	0	0	705	0	0	0	0	0	19	685	0	745	8	9	0	0	147	351	173	0	0	0	581	0	649	0	0	361	284	0	0	850	3	211	0	0
d__Bacteria;p__Bacillota_A_368345;c__Clostridia_258483;o__Peptostreptococcales;f__Anaerovoracaceae;g__Emergencia;s__Emergencia timonensis	0	604	23	952	0	99	23	239	865	3609	30	0	36	0	0	0	0	0	27	10	50	0	31	258	5	0	6	4	0	0	0	0	0	0	0	0	0	0	0	76	22	0	22	44	0
d__Bacteria;p__Bacteroidota;c__Bacteroidia;o__Bacteroidales;f__Rikenellaceae;g__Alistipes_A_871400;s__Alistipes_A_871400 sp002362235	0	131	9	40	0	64	311	0	0	678	0	16	0	0	417	231	280	6	0	0	0	0	0	8	0	0	0	4	0	46	22	0	0	0	19	0	351	452	0	1681	8	1073	0	5	0
d__Bacteria;p__Bacillota_A_368345;c__Clostridia_258483;o__Lachnospirales;f__Lachnospiraceae;g__Blautia_A_141780;s__Blautia_A_141780 celeris	4	212	143	191	0	24	0	52	168	38	38	0	53	309	148	54	146	50	76	936	16	113	281	29	330	4	0	0	83	0	0	73	307	107	651	258	34	552	197	72	103	347	24	30	53
d__Bacteria;p__Bacillota_A_368345;c__Clostridia_258483;o__Oscillospirales;f__Ruminococcaceae;g__Ruminiclostridium_E;s__Ruminiclostridium_E siraeum	0	0	0	0	0	0	0	0	0	0	0	0	2	0	0	0	0	0	0	0	0	3	5	0	0	8	696	0	0	0	0	2082	5	674	0	2	2425	0	0	0	0	2	0	0	0
d__Bacteria;p__Bacillota_A_368345;c__Clostridia_258483;o__Lachnospirales;f__Lachnospiraceae;g__UBA9414;s__	0	1865	0	109	1346	178	76	0	0	1486	17	0	0	0	0	0	0	0	0	0	0	0	0	0	0	0	0	0	0	0	0	0	0	0	0	0	0	0	0	0	0	0	0	0	0
d__Bacteria;p__Bacillota_A_368345;c__Clostridia_258483;o__Lachnospirales;f__Lachnospiraceae;g__Luxibacter;s__Luxibacter massiliensis	275	0	921	3	0	0	0	19	91	0	78	0	0	119	0	86	29	50	0	105	0	12	0	0	5	0	0	0	0	0	0	0	418	26	51	280	5	1448	173	245	39	78	0	24	482
d__Bacteria;p__Bacillota_I;c__Bacilli_A;o__Erysipelotrichales;f__Erysipelotrichaceae;g__Dielma;s__Dielma fastidiosa	3916	119	118	295	11	5	0	98	19	84	312	0	0	0	0	0	0	0	0	0	0	0	0	0	0	0	0	0	0	0	0	0	0	0	0	0	0	0	0	0	0	0	0	0	0
d__Bacteria;p__Bacteroidota;c__Bacteroidia;o__Bacteroidales;f__Muribaculaceae;g__Muribaculum;s__Muribaculum gordoncarteri	2	0	0	0	0	0	0	0	0	0	0	0	0	0	0	0	0	0	0	0	1243	189	756	0	2	0	0	0	0	0	6242	0	0	0	0	0	0	0	0	0	0	0	447	0	0
d__Bacteria;p__Bacillota_A_368345;c__Clostridia_258483;o__Lachnospirales;f__Lachnospiraceae;g__Oliverpabstia;s__Oliverpabstia tarda	0	142	0	0	0	0	0	8	0	0	0	0	0	0	168	0	0	69	492	151	156	709	871	544	761	0	0	0	0	0	0	0	0	106	111	0	0	0	0	0	0	29	0	16	0
d__Bacteria;p__Bacillota_A_368345;c__Clostridia_258483;o__Lachnospirales;f__Lachnospiraceae;g__Butyrivibrio_A_180067;s__Butyrivibrio_A_180067 crossotus	0	0	0	0	2174	2027	0	0	0	0	0	0	0	0	0	0	0	0	0	0	0	0	0	0	0	0	0	0	0	0	0	0	0	0	0	0	0	0	0	0	0	0	0	0	0
d__Bacteria;p__Bacillota_A_368345;c__Clostridia_258483;o__Lachnospirales;f__Lachnospiraceae;g__Laedolimicola;s__Laedolimicola sp011959465	0	146	0	16	456	430	1118	196	1049	330	11	158	285	10	27	26	0	24	37	13	24	243	67	151	99	374	133	129	96	0	226	62	0	69	35	0	222	0	0	463	27	33	767	233	0
d__Bacteria;p__Bacillota_A_368345;c__Clostridia_258483;o__Lachnospirales;f__Lachnospiraceae;g__Kineothrix;s__Kineothrix sp000403275	0	9	0	3	144	7	151	178	27	1408	22	13	74	0	12	0	0	0	4	0	9	2113	35	39	16	382	71	221	31	111	101	0	3	16	19	0	31	0	0	101	10	10	877	485	4
d__Bacteria;p__Bacillota_I;c__Bacilli_A;o__Lactobacillales;f__Lactobacillaceae;g__Limosilactobacillus;s__Limosilactobacillus reuteri	0	0	49	167	0	15	0	318	23	20	358	79	14	10	48	0	5	6	10	45	48	1118	92	64	217	0	34	0	8	9	0	0	0	5	1791	9	0	261	5	0	169	272	21	32	7
d__Bacteria;p__Bacteroidota;c__Bacteroidia;o__Bacteroidales;f__Marinifilaceae;g__Odoribacter_865974;s__Odoribacter splanchnicus	0	98	10	124	62	56	489	0	0	0	0	0	323	0	184	0	0	26	0	0	0	894	0	0	0	0	150	91	36	249	140	39	0	176	9	0	230	310	0	0	0	0	140	87	0
d__Bacteria;p__Bacillota_I;c__Bacilli_A;o__Erysipelotrichales;f__Erysipelotrichaceae;g__Holdemania;s__Holdemania massiliensis	14	57	49	0	0	32	20	133	401	186	14	5	21	84	74	127	61	56	25	163	36	122	70	51	50	3	3	0	76	17	18	29	129	43	293	219	10	143	37	192	75	212	31	37	158
d__Bacteria;p__Bacillota_A_368345;c__Clostridia_258483;o__Peptostreptococcales;f__Peptostreptococcaceae_256921;g__Faecalimicrobium;s__Faecalimicrobium dakarense	270	0	31	520	176	13	0	10	0	0	2544	0	0	0	0	0	0	0	0	0	0	0	0	0	0	0	0	0	0	0	0	0	0	0	0	0	0	0	0	0	0	0	0	0	0
d__Bacteria;p__Bacteroidota;c__Bacteroidia;o__Bacteroidales;f__Muribaculaceae;g__UBA7173;s__UBA7173 sp002491305	0	133	0	0	2	0	0	0	0	0	64	0	0	0	1129	60	0	237	0	0	0	0	2	0	7	107	233	249	253	285	244	185	0	874	671	50	219	623	0	0	0	1713	11	203	0
d__Bacteria;p__Bacillota_A_368345;c__Clostridia_258483;o__TANB77;f__CAG-508;g__;s__	247	775	172	206	1168	88	213	2286	138	68	106	6	9	0	0	0	2	0	0	0	0	3	0	0	0	0	17	311	0	0	52	0	0	0	0	0	0	0	0	0	2	0	0	406	0
d__Bacteria;p__Bacillota_A_368345;c__Clostridia_258483;o__Oscillospirales;f__Oscillospiraceae_88309;g__Evtepia;s__	0	102	12	91	293	305	78	287	52	0	8	0	0	0	11	0	64	38	0	0	7	0	0	0	0	415	0	24	51	0	22	0	162	72	185	0	23	1038	0	320	34	0	0	71	143
d__Bacteria;p__Bacillota_A_368345;c__Clostridia_258483;o__Lachnospirales;f__Lachnospiraceae;g__Faecalimonas;s__Faecalimonas umbilicata	0	0	0	0	0	0	0	298	756	251	2039	0	0	0	0	0	0	0	0	0	0	0	0	0	0	0	0	0	0	0	0	0	0	0	0	0	0	0	0	0	0	0	0	0	0
d__Bacteria;p__Bacillota_A_368345;c__Clostridia_258483;o__Lachnospirales;f__Lachnospiraceae;g__Roseburia_A_166204;s__Roseburia_A_166204 cecicola	0	0	0	0	0	0	0	0	0	0	0	87	357	0	621	0	446	0	80	0	0	72	0	282	0	33	73	163	136	0	103	225	0	96	303	0	170	0	0	0	0	36	50	0	0
d__Bacteria;p__Bacteroidota;c__Bacteroidia;o__Bacteroidales;f__Muribaculaceae;g__Lepagella;s__Lepagella muris_A	0	0	0	0	60	0	0	0	0	0	0	384	3361	41	13	0	0	0	0	22	8	10	0	15	0	65	0	0	0	0	652	0	0	42	0	0	0	0	0	0	0	0	0	20	0
d__Bacteria;p__Bacillota_A_368345;c__Clostridia_258483;o__Clostridiales;f__Clostridiaceae_222000;g__Sarcina_200052;s__	104	0	1234	3	0	11	0	215	2	2	1721	0	0	0	0	0	0	0	0	0	0	0	0	0	0	0	0	0	0	0	0	0	0	0	0	0	0	0	0	0	0	0	0	0	0
d__Bacteria;p__Bacillota_B_370539;c__Dehalobacteriia;o__Dehalobacteriales;f__Dehalobacteriaceae;g__;s__	0	75	26	40	20	98	25	0	0	230	0	215	216	0	7	0	0	30	34	0	76	25	58	98	0	294	0	50	127	314	180	0	0	0	0	0	0	27	0	20	0	96	301	160	147
d__Bacteria;p__Bacillota_A_368345;c__Clostridia_258483;o__Peptostreptococcales;f__Peptostreptococcaceae_256921;g__Terrisporobacter;s__	270	0	332	0	0	0	0	0	0	0	1592	0	0	0	0	19	34	0	0	260	0	0	0	0	0	0	0	0	0	0	0	0	152	0	0	368	0	0	70	0	0	0	0	4	0
d__Bacteria;p__Bacillota_A_368345;c__Clostridia_258483;o__Lachnospirales;f__Lachnospiraceae;g__MD308;s__MD308 sp000403475	0	0	0	0	10	0	27	123	1975	217	0	9	9	0	0	0	0	0	0	0	11	0	12	13	12	12	63	37	0	0	0	0	0	0	0	0	40	0	0	108	15	0	18	10	7
d__Bacteria;p__Bacillota_A_368345;c__Clostridia_258483;o__Oscillospirales;f__Acutalibacteraceae;g__Ruminococcus_E;s__Ruminococcus_E bromii_B	0	0	0	106	397	131	69	0	0	0	0	441	0	0	82	0	0	0	260	4	26	9	0	848	200	0	42	0	0	0	47	0	0	0	0	0	0	0	0	0	0	0	0	27	0
d__Bacteria;p__Bacillota_I;c__Bacilli_A;o__Lactobacillales;f__Lactobacillaceae;g__Lactobacillus;s__Lactobacillus johnsonii	0	0	17	113	0	0	0	1020	12	40	497	251	0	7	20	0	0	5	0	8	7	82	21	22	44	0	47	0	22	0	0	0	0	2	23	0	0	55	4	0	65	213	5	70	0
d__Bacteria;p__Bacillota_A_368345;c__Clostridia_258483;o__Lachnospirales;f__Lachnospiraceae;g__Petralouisia;s__	0	0	0	0	0	0	0	0	0	0	0	408	910	0	20	0	0	0	0	0	5	0	67	18	6	1995	21	324	0	0	420	13	0	0	0	0	553	0	0	0	31	0	0	0	77
d__Bacteria;p__Bacillota_A_368345;c__Clostridia_258483;o__Oscillospirales;f__Ruminococcaceae;g__Harryflintia;s__	9	32	14	64	48	84	35	0	210	0	176	16	152	72	102	0	32	71	12	91	6	212	0	76	0	66	0	12	69	119	20	19	0	0	118	0	190	18	0	103	16	34	75	141	88
d__Bacteria;p__Bacillota_A_368345;c__Clostridia_258483;o__Lachnospirales;f__Lachnospiraceae;g__Roseburia_A_166204;s__Roseburia_A_166204 sp001940165	0	0	0	0	0	0	0	0	0	0	0	39	1185	0	0	0	0	0	0	0	0	0	0	0	0	0	190	627	237	0	0	269	0	0	0	0	0	0	0	0	0	0	0	0	0
d__Bacteria;p__Bacillota_I;c__Bacilli_A;o__Erysipelotrichales;f__Erysipelotrichaceae;g__Faecalibaculum;s__Faecalibaculum rodentium	0	0	620	0	0	5	0	1129	0	0	724	5	0	0	39	46	65	0	0	0	0	0	0	0	0	0	0	0	0	0	0	0	0	0	0	0	0	0	0	0	0	0	0	0	0
d__Bacteria;p__Bacillota_A_368345;c__Clostridia_258483;o__Oscillospirales;f__Ruminococcaceae;g__Massilioclostridium;s__	0	27	3	0	103	7	42	0	0	0	0	135	308	13	0	40	44	9	21	4	36	43	17	25	0	210	75	198	76	348	8	36	0	168	21	0	88	0	0	16	46	32	94	33	4
d__Bacteria;p__Bacillota_A_368345;c__Clostridia_258483;o__Oscillospirales;f__Butyricicoccaceae;g__Agathobaculum;s__Agathobaculum ammoniilyticum	7	30	4	11	9	27	0	167	51	23	19	0	0	0	0	0	58	0	0	0	0	310	389	134	272	0	0	0	0	0	0	0	0	75	0	42	0	65	20	0	0	268	0	0	141
d__Bacteria;p__Bacillota_I;c__Bacilli_A;o__MOL361;f__Turicibacteraceae;g__Turicibacter;s__Turicibacter bilis	0	366	15	65	71	208	51	0	0	0	0	0	0	0	0	75	89	0	0	26	0	147	5	0	0	0	0	0	0	0	0	0	214	20	406	210	66	15	24	14	0	0	0	16	0
d__Bacteria;p__Bacillota_A_368345;c__Clostridia_258483;o__Monoglobales;f__Monoglobaceae;g__Monoglobus;s__	0	0	0	0	0	0	0	186	0	0	0	0	0	0	0	0	0	1819	26	0	0	0	0	0	0	3	0	0	0	0	0	2	19	60	341	0	14	0	0	0	31	0	4	0	0
d__Bacteria;p__Bacillota_A_368345;c__Clostridia_258483;o__TANB77;f__CAG-508;g__CAG-269;s__CAG-269 sp000431335	52	17	47	102	173	143	0	30	10	0	0	60	0	0	0	0	0	30	438	0	11	142	8	30	0	23	49	161	7	9	303	71	134	0	609	149	0	0	258	155	47	903	17	29	66
d__Bacteria;p__Actinomycetota;c__Coriobacteriia;o__Coriobacteriales;f__Eggerthellaceae;g__Adlercreutzia_A_404257;s__Adlercreutzia_A_404257 equolifaciens	0	21	87	26	66	116	0	85	44	110	17	52	56	28	49	43	39	42	166	62	31	503	198	108	464	68	14	21	42	64	37	15	54	72	273	35	51	60	179	476	75	254	14	140	100
d__Bacteria;p__Bacillota_B_370539;c__Peptococcia_369891;o__Peptococcales_369891;f__Desulfonisporaceae;g__Desulfonispora;s__Peptococcus niger	93	334	45	61	322	1235	29	0	142	95	52	69	213	7	144	115	53	89	18	9	6	14	6	30	105	14	14	6	125	104	23	20	0	78	136	0	2	17	0	178	0	129	20	85	0
d__Bacteria;p__Pseudomonadota;c__Gammaproteobacteria;o__Enterobacterales_737866;f__Pasteurellaceae;g__Rodentibacter_A_734545;s__Rodentibacter_A_734545 mrazii	1314	7	3	76	0	59	3	0	0	0	13	0	0	0	3	0	0	0	0	9	0	0	4	0	0	2	0	0	0	0	0	0	3	0	42	28	0	0	0	0	0	0	0	12	0
d__Bacteria;p__Bacillota_A_368345;c__Clostridia_258483;o__Lachnospirales;f__Lachnospiraceae;g__Eubacterium_F;s__Eubacterium_F sp000687695	0	0	0	0	0	0	0	0	0	0	0	0	0	0	0	0	0	0	0	0	0	0	6	0	0	0	1563	0	0	0	0	0	0	0	0	0	0	0	0	0	0	0	0	0	0
d__Bacteria;p__Bacillota_A_368345;c__Clostridia_258483;o__UBA1381;f__UBA1381;g__Hominilimicola;s__Hominilimicola sp001941225	0	0	7	57	0	12	0	141	17	10	71	0	0	0	41	13	0	9	111	99	32	240	0	161	122	21	5	0	0	0	5	54	0	0	0	0	0	193	0	205	6	8	68	19	0
d__Bacteria;p__Pseudomonadota;c__Gammaproteobacteria;o__Enterobacterales_737866;f__Enterobacteriaceae_A_725029;g__Klebsiella_724518;s__Klebsiella oxytoca	186	0	0	0	0	0	0	0	0	0	0	0	0	8	9	723	0	11	0	0	0	0	3	0	0	0	0	0	0	0	0	0	13	0	0	1000	0	0	11	0	0	0	0	0	0
d__Bacteria;p__Bacillota_A_368345;c__Clostridia_258483;o__Christensenellales;f__Christensenellaceae;g__Christensenella;s__	0	75	0	32	17	29	27	35	93	167	4	8	6	2	4	33	0	18	39	5	44	10	41	24	96	3	0	2	19	18	9	7	11	10	42	3	7	41	18	30	55	225	31	51	23
d__Bacteria;p__Bacillota_A_368345;c__Clostridia_258483;o__Oscillospirales;f__Oscillospiraceae_88309;g__Dysosmobacter;s__	0	12	14	16	17	27	43	0	0	91	0	106	36	0	0	0	0	0	8	0	14	31	0	23	16	185	35	415	12	87	58	9	0	10	0	0	43	0	0	0	13	0	45	31	0
d__Bacteria;p__Bacillota_A_368345;c__Clostridia_258483;o__Clostridiales;f__Clostridiaceae_222000;g__Clostridium_T;s__Clostridium_T septicum	166	0	4	0	0	0	0	0	0	0	1184	0	0	0	0	0	0	0	0	0	0	0	0	0	0	0	0	0	0	0	0	0	0	0	0	0	0	0	0	0	0	0	0	0	0
d__Bacteria;p__Bacillota_A_368345;c__Clostridia_258483;o__Oscillospirales;f__Acutalibacteraceae;g__UBA5905;s__	0	9	5	25	2	3	2	0	2	0	0	12	224	12	6	44	39	0	123	17	106	28	7	50	51	0	6	0	173	15	30	37	128	13	5	0	33	31	0	24	30	3	14	42	0
d__Bacteria;p__Bacillota_A_368345;c__Clostridia_258483;o__Oscillospirales;f__Ruminococcaceae;g__Porcipelethomonas;s__Porcipelethomonas ammoniilytica	0	0	0	0	0	0	0	0	0	1250	0	0	0	0	0	0	0	0	0	0	0	0	0	0	0	0	0	0	0	0	0	0	0	0	0	0	0	0	0	0	0	0	0	0	0
d__Bacteria;p__Bacillota_A_368345;c__Clostridia_258483;o__Lachnospirales;f__Lachnospiraceae;g__Sporofaciens;s__Sporofaciens sp000403455	0	8	4	11	48	18	82	125	0	140	0	91	513	0	0	0	0	11	8	0	0	15	24	21	18	514	49	64	23	0	133	7	0	16	7	0	183	5	0	155	0	0	217	103	19
d__Bacteria;p__Bacillota_A_368345;c__Clostridia_258483;o__Peptostreptococcales;f__Anaerovoracaceae;g__Hominibacterium;s__Hominibacterium faecale	0	3	0	10	157	11	33	0	0	18	0	4	19	0	47	119	0	13	0	46	7	2	0	0	0	16	20	89	91	19	9	154	55	83	85	0	111	284	0	112	0	238	0	0	0
d__Bacteria;p__Bacillota_A_368345;c__Clostridia_258483;o__Oscillospirales;f__Ruminococcaceae;g__Anaerotruncus;s__Anaerotruncus sp000403395	0	23	0	7	4	0	57	77	290	304	24	0	2	0	0	0	0	0	0	0	0	26	0	16	0	0	0	0	5	31	0	0	0	3	0	0	0	0	0	102	0	2	254	61	6
d__Bacteria;p__Bacteroidota;c__Bacteroidia;o__Bacteroidales;f__Muribaculaceae;g__Muribaculum;s__Muribaculum intestinale	0	79	54	4	0	0	197	0	83	187	16	10	600	4	6	0	0	30	0	0	0	0	0	0	0	33	26	15	71	30	109	19	17	0	0	0	0	0	0	45	0	25	2	0	0
d__Bacteria;p__Bacillota_A_368345;c__Clostridia_258483;o__Oscillospirales;f__CAG-272;g__RUG13077;s__	0	0	0	0	0	0	0	0	0	0	0	39	243	0	61	26	0	212	0	0	20	0	0	0	0	7	8	143	288	34	6	79	0	51	8	0	67	0	0	0	0	0	0	7	0
d__Bacteria;p__Bacillota_I;c__Bacilli_A;o__Lactobacillales;f__Enterococcaceae;g__Enterococcus_B;s__Enterococcus_B faecium	20	5	7	57	0	97	0	9	0	0	37	0	0	71	39	20	104	44	0	69	0	5	0	0	19	0	23	0	6	27	0	0	17	7	48	47	22	52	56	4	4	18	31	0	7
d__Bacteria;p__Bacillota_A_368345;c__Clostridia_258483;o__Oscillospirales;f__Ruminococcaceae;g__Massiliimalia;s__Massiliimalia timonensis	0	10	0	4	0	0	2	99	114	115	27	0	0	0	3	0	16	23	0	57	11	63	5	3	94	0	0	0	31	0	3	10	38	0	20	0	0	32	0	45	25	58	0	3	54
d__Bacteria;p__Bacillota_A_368345;c__Clostridia_258483;o__Oscillospirales;f__Ruminococcaceae;g__Paludihabitans;s__Paludihabitans psychrotolerans	0	12	14	53	64	113	38	0	0	124	0	32	226	13	7	60	0	13	17	36	22	26	14	52	34	319	128	150	84	151	53	52	35	50	64	4	287	65	0	5	59	96	41	59	0
d__Bacteria;p__Bacillota_A_368345;c__Clostridia_258483;o__TANB77;f__CAG-508;g__UMGS1994;s__UMGS1994 sp900553945	0	51	3	11	552	155	13	0	0	0	0	0	0	0	0	0	0	0	0	0	0	0	0	0	0	12	0	144	0	0	8	0	0	0	0	0	0	0	0	0	0	0	0	0	0
d__Bacteria;p__Bacillota_A_368345;c__Clostridia_258483;o__Oscillospirales;f__Acutalibacteraceae;g__Caproiciproducens;s__	0	51	0	6	37	0	5	0	0	304	0	8	14	0	5	4	0	0	26	0	37	17	12	34	263	0	6	7	10	8	2	0	0	0	2	2	15	4	0	0	0	0	33	21	0
d__Bacteria;p__Bacillota_A_368345;c__Clostridia_258483;o__Oscillospirales;f__CAG-272;g__Avispirillum;s__Avispirillum sp011957885	0	39	10	7	45	191	73	0	18	69	0	94	48	0	4	0	0	5	53	0	22	6	4	67	0	82	53	38	16	39	74	28	3	60	13	0	184	64	0	25	0	89	61	67	0
d__Bacteria;p__Bacillota_A_368345;c__Clostridia_258483;o__Oscillospirales;f__Ruminococcaceae;g__Massilioclostridium;s__Massilioclostridium methylpentosum	10	0	6	0	0	0	0	18	8	0	15	0	0	15	0	12	4	8	29	124	39	14	108	0	89	0	0	0	0	0	0	0	10	0	14	0	0	0	26	20	22	106	9	11	145
d__Bacteria;p__Bacillota_A_368345;c__Clostridia_258483;o__Oscillospirales;f__Acutalibacteraceae;g__Ruminococcus_E;s__Ruminococcus_E sp900100595	0	0	0	0	0	0	0	0	0	0	0	0	562	0	0	0	0	0	0	0	0	0	20	0	254	0	0	0	0	0	0	0	0	0	0	0	0	0	0	0	0	0	0	0	0
d__Bacteria;p__Bacteroidota;c__Bacteroidia;o__Bacteroidales;f__Muribaculaceae;g__Duncaniella;s__Duncaniella muricolitica	0	0	0	21	351	13	58	0	0	0	0	0	0	0	0	0	0	0	0	0	0	0	0	0	0	0	0	47	0	0	40	0	0	0	0	0	24	0	0	0	0	0	0	206	0
d__Bacteria;p__Bacillota_A_368345;c__Clostridia_258483;o__Lachnospirales;f__Lachnospiraceae;g__Choladousia;s__Choladousia sp003612585	0	9	19	4	10	8	4	0	0	78	13	9	19	5	26	14	0	14	90	38	34	103	121	36	141	14	0	0	6	0	0	23	0	0	72	0	0	102	15	18	13	43	32	29	29
d__Bacteria;p__Bacillota_A_368345;c__Clostridia_258483;o__Oscillospirales;f__Oscillospiraceae_88309;g__Faecousia;s__	0	11	6	7	17	42	0	0	0	0	0	8	14	0	0	0	0	0	0	0	10	0	0	4	0	5	2	0	0	0	0	0	0	2	0	0	10	574	0	0	4	162	4	7	0
d__Bacteria;p__Bacillota_A_368345;c__Clostridia_258483;o__Peptostreptococcales;f__Peptostreptococcaceae_256921;g__;s__	0	0	0	0	0	211	0	0	0	0	129	0	0	0	0	0	0	0	0	0	0	42	72	0	0	0	0	0	0	0	0	0	58	17	355	35	12	0	0	29	11	46	0	0	0
d__Bacteria;p__Bacillota_A_368345;c__Clostridia_258483;o__Oscillospirales;f__Acutalibacteraceae;g__;s__	0	0	0	0	0	98	0	0	0	0	0	0	0	0	0	177	0	0	97	28	0	0	5	0	257	0	5	0	0	0	0	19	0	0	69	0	7	0	0	0	0	0	0	0	0
d__Bacteria;p__Bacillota_A_368345;c__Clostridia_258483;o__Lachnospirales;f__Lachnospiraceae;g__Brotaphodocola;s__Brotaphodocola sp003481825	0	0	0	0	0	0	0	0	0	0	0	6	0	42	0	86	0	51	0	0	0	16	155	79	274	0	0	0	0	0	0	0	0	0	0	0	0	15	0	0	0	0	0	0	0
d__Bacteria;p__Actinomycetota;c__Actinomycetes;o__Actinomycetales;f__Bifidobacteriaceae;g__Bifidobacterium_388775;s__Bifidobacterium animalis	0	0	8	0	0	0	0	0	0	0	4	80	0	118	63	109	21	69	21	20	0	14	0	0	0	0	0	0	0	0	0	25	0	0	38	0	6	94	9	0	0	2	0	6	0
d__Bacteria;p__Bacillota_A_368345;c__Clostridia_258483;o__Oscillospirales;f__Acutalibacteraceae;g__Acutalibacter;s__Acutalibacter muris	0	0	0	0	20	0	0	0	0	44	0	64	9	0	0	0	3	0	0	0	0	0	4	0	0	95	36	107	0	21	26	0	7	0	0	0	11	0	0	0	0	0	447	0	0
d__Bacteria;p__Bacillota_A_368345;c__Clostridia_258483;o__Oscillospirales;f__Oscillospiraceae_88309;g__Evtepia;s__Evtepia viridis	31	64	0	4	70	30	60	126	128	408	12	87	128	10	56	42	10	35	48	14	40	0	21	70	13	116	85	21	72	136	47	7	3	171	0	0	191	4	21	11	14	0	88	10	0
d__Bacteria;p__Bacillota_A_368345;c__Clostridia_258483;o__Oscillospirales;f__Acutalibacteraceae;g__Clostridium_A_51961;s__Clostridium_A_51961 leptum	0	25	0	5	3	6	0	0	8	14	0	26	38	8	13	81	0	24	16	2	2	6	4	20	40	0	12	16	21	25	8	9	0	8	12	0	43	8	43	0	25	29	8	12	0
d__Bacteria;p__Bacillota_A_368345;c__Clostridia_258483;o__Peptostreptococcales;f__Anaerovoracaceae;g__Lentihominibacter;s__Lentihominibacter butyrica	0	19	44	113	0	33	0	0	0	0	0	2	6	0	0	25	0	14	10	10	13	30	42	22	42	0	0	0	4	0	0	0	15	0	2	0	0	67	17	0	17	50	0	8	0
d__Bacteria;p__Bacillota_A_368345;c__Clostridia_258483;o__DSM-8532;f__;g__;s__	0	0	0	0	6	26	0	0	0	11	0	112	0	0	3	0	0	0	40	0	11	0	0	51	0	60	0	12	22	0	6	98	0	0	17	0	55	3	0	0	0	0	19	48	0
d__Bacteria;p__Pseudomonadota;c__Gammaproteobacteria;o__Pseudomonadales_A_650611;f__Pseudomonadaceae;g__Pseudomonas_E_647464;s__Pseudomonas_E_647464 paraversuta	0	0	0	0	0	0	0	0	0	0	0	0	0	0	0	0	0	199	0	0	0	0	0	0	0	32	19	52	45	14	16	33	39	0	22	7	0	12	17	2	0	54	13	0	5
d__Bacteria;p__Bacillota_A_368345;c__Clostridia_258483;o__Lachnospirales;f__Lachnospiraceae;g__Brotaphodocola;s__Brotaphodocola sp003611875	0	0	0	0	138	11	16	0	7	0	0	0	51	0	0	0	0	0	0	0	8	13	0	0	0	96	156	170	0	0	46	0	0	0	0	0	0	0	0	0	0	0	65	53	0
d__Bacteria;p__Bacillota_A_368345;c__Clostridia_258483;o__Oscillospirales;f__Oscillospiraceae_88309;g__WRMH01;s__WRMH01 sp009777235	0	49	4	10	0	15	12	0	0	124	0	3	53	0	16	18	0	17	0	4	20	0	3	34	6	14	0	8	27	29	0	0	0	22	18	0	15	12	0	0	0	12	29	21	0
d__Bacteria;p__Actinomycetota;c__Actinomycetes;o__Actinomycetales;f__Bifidobacteriaceae;g__Bifidobacterium_388775;s__Bifidobacterium globosum	0	0	0	0	0	0	0	0	0	0	0	0	29	0	210	55	152	0	0	0	0	0	0	0	0	21	0	0	0	0	0	0	54	0	169	20	13	0	220	0	0	0	0	8	0
d__Bacteria;p__Bacillota_A_368345;c__Clostridia_258483;o__Lachnospirales;f__Lachnospiraceae;g__Eisenbergiella;s__	0	0	0	0	0	0	0	0	0	155	0	0	476	0	3	0	0	0	0	0	0	0	0	0	0	0	0	0	0	0	10	0	0	0	0	0	0	0	0	0	0	0	0	0	0
d__Bacteria;p__Bacillota_I;c__Bacilli_A;o__Lactobacillales;f__Enterococcaceae;g__Enterococcus_H_360604;s__Enterococcus_H_360604 faecalis	179	0	0	32	0	16	4	0	0	0	0	0	0	20	0	30	56	0	12	14	0	12	12	0	0	0	0	0	0	0	0	0	0	0	4	26	0	68	8	0	0	0	0	3	0
d__Bacteria;p__Bacillota_A_368345;c__Clostridia_258483;o__Oscillospirales;f__QAKW01;g__;s__	15	0	12	0	0	0	0	0	4	0	12	6	16	7	12	46	13	30	38	12	10	14	14	19	38	0	7	0	3	0	0	4	24	27	31	0	2	55	30	44	20	32	7	39	22
d__Bacteria;p__Bacillota_A_368345;c__Clostridia_258483;o__Lachnospirales;f__Lachnospiraceae;g__Muricomes_149720;s__	298	0	0	34	0	0	0	11	50	0	31	0	0	0	0	0	0	0	0	0	0	0	0	0	0	0	0	0	0	0	0	0	0	0	0	0	0	0	0	0	0	0	0	0	0
d__Bacteria;p__Bacillota_A_368345;c__Clostridia_258483;o__Lachnospirales;f__Lachnospiraceae;g__Schaedlerella;s__Schaedlerella sp000403295	0	0	0	0	51	68	10	8	0	140	0	0	4	0	0	0	0	0	0	0	0	0	0	0	0	177	50	151	0	0	0	0	0	0	0	0	0	0	0	12	8	0	67	18	11
d__Bacteria;p__Bacillota_A_368345;c__Clostridia_258483;o__Lachnospirales;f__Lachnospiraceae;g__Ruminococcus_B;s__	0	0	0	11	0	10	0	0	0	14	0	4	12	0	0	0	2	0	0	0	0	4	27	10	15	15	12	18	14	144	0	8	0	14	54	0	6	0	0	0	4	15	18	0	0
d__Bacteria;p__Pseudomonadota;c__Alphaproteobacteria;o__Rs-D84_512864;f__Rs-D84;g__;s__	23	0	0	0	0	0	0	0	0	0	0	8	9	7	16	0	0	98	0	3	0	0	0	6	0	0	0	0	0	10	0	0	0	11	5	11	0	8	107	0	17	38	0	0	8
d__Bacteria;p__Bacillota_A_368345;c__Clostridia_258483;o__Lachnospirales;f__Lachnospiraceae;g__Lientehia;s__Lientehia sp902363445	0	88	7	7	138	76	83	0	275	103	0	12	10	9	7	9	10	3	0	0	0	0	8	17	14	50	15	64	5	0	14	0	0	19	11	0	36	0	0	0	0	0	60	19	6
d__Bacteria;p__Actinomycetota;c__Coriobacteriia;o__Coriobacteriales;f__Eggerthellaceae;g__Enterorhabdus;s__Enterorhabdus sp009911695	0	0	0	0	5	0	0	0	0	6	5	18	15	0	13	4	0	6	0	9	0	7	6	5	90	3	0	0	14	26	0	0	0	25	35	0	0	0	3	6	16	35	11	0	23
d__Bacteria;p__Bacillota_A_368345;c__Clostridia_258483;o__;f__;g__;s__	0	7	18	16	7	44	0	0	0	110	0	27	5	0	0	9	0	13	0	3	0	0	0	0	0	6	29	9	7	32	8	18	0	18	7	0	4	10	0	15	7	0	0	10	160
d__Bacteria;p__Cyanobacteriota;c__Vampirovibrionia;o__Gastranaerophilales;f__Gastranaerophilaceae;g__CAG-196;s__CAG-196 sp002102975	0	0	0	0	0	0	0	236	67	0	0	0	0	0	0	0	0	0	0	4	0	0	2	0	12	0	0	48	2	28	0	0	0	0	0	0	0	0	0	0	0	0	0	0	0
d__Bacteria;p__Bacillota_A_368345;c__Clostridia_258483;o__Oscillospirales;f__Butyricicoccaceae;g__Pseudobutyricicoccus;s__Pseudobutyricicoccus sp003477405	0	0	0	0	46	0	42	0	0	0	0	23	40	0	0	0	0	0	0	0	4	22	0	5	0	38	22	27	0	0	0	2	0	0	0	0	4	0	0	0	0	0	11	13	0
d__Bacteria;p__Pseudomonadota;c__Gammaproteobacteria;o__Enterobacterales_737866;f__Enterobacteriaceae_A_725029;g__Superficieibacter;s__Superficieibacter sp001187865	29	0	0	0	0	0	0	0	0	0	0	0	0	0	0	121	27	0	0	0	0	0	0	0	0	0	0	0	0	0	0	0	0	0	0	119	0	0	0	0	0	0	0	0	0
d__Bacteria;p__Bacteroidota;c__Bacteroidia;o__Bacteroidales;f__Muribaculaceae;g__UBA3263;s__UBA3263 sp001689615	0	66	0	0	84	0	76	0	0	0	0	0	0	0	0	0	0	0	0	0	0	0	0	0	2	0	0	11	0	0	0	40	0	207	0	0	0	0	0	0	0	0	0	0	0
d__Bacteria;p__Bacillota_A_368345;c__Clostridia_258483;o__Peptostreptococcales;f__Anaerovoracaceae;g__Eubacterium_N_234271;s__	0	22	0	6	40	18	0	0	0	0	0	3	0	0	0	18	0	0	20	6	23	0	7	18	0	0	10	3	0	0	0	20	0	18	0	0	0	29	0	0	0	0	5	15	0
d__Bacteria;p__Bacillota_I;c__Bacilli_A;o__Lactobacillales;f__Streptococcaceae;g__Streptococcus;s__Streptococcus acidominimus	17	0	16	46	0	69	0	30	0	0	20	0	0	3	4	0	0	0	0	0	0	3	17	2	3	0	0	0	2	0	0	0	0	0	5	2	0	0	0	0	0	0	0	0	0
d__Bacteria;p__Actinomycetota;c__Actinomycetes;o__Actinomycetales;f__Bifidobacteriaceae;g__Bifidobacterium_388775;s__Bifidobacterium choerinum	0	0	0	0	0	0	0	0	0	0	0	0	0	24	0	12	0	0	0	0	0	0	0	0	0	41	7	0	22	0	49	0	0	23	58	0	0	0	0	0	0	0	0	0	0
d__Bacteria;p__Bacillota_A_368345;c__Clostridia_258483;o__Lachnospirales;f__Lachnospiraceae;g__Lachnoclostridium_B;s__Lachnoclostridium_B intestinigallinarum	0	0	6	0	8	0	9	72	23	0	0	28	22	0	0	0	0	0	7	3	0	15	0	14	0	43	11	4	0	0	11	5	0	3	7	0	19	0	0	0	6	45	8	0	0
d__Bacteria;p__Bacillota_A_368345;c__Clostridia_258483;o__Oscillospirales;f__Ruminococcaceae;g__Anaerotruncus;s__Anaerotruncus massiliensis_A	0	3	0	23	0	5	7	0	0	0	0	0	7	2	2	0	0	17	15	4	17	5	0	4	0	0	0	0	0	0	0	7	20	9	0	0	0	15	22	3	12	16	0	15	0
d__Bacteria;p__Bacillota_A_368345;c__Clostridia_258483;o__Lachnospirales;f__Lachnospiraceae;g__Ruminococcus_G;s__Ruminococcus_G gauvreauii	0	6	0	12	0	5	0	8	12	9	11	0	0	3	11	12	11	9	0	7	5	0	11	3	8	0	3	0	0	0	0	0	8	3	17	0	0	7	28	9	8	18	0	0	9
d__Bacteria;p__Bacillota_A_368345;c__Clostridia_258483;o__Peptostreptococcales;f__Anaerovoracaceae;g__;s__	0	0	0	89	69	8	4	0	0	3	0	2	0	0	0	0	0	0	4	0	0	0	0	6	0	6	0	2	0	0	10	4	0	0	0	0	5	0	0	0	0	0	17	50	0
d__Bacteria;p__Bacillota_A_368345;c__Clostridia_258483;o__Lachnospirales;f__Lachnospiraceae;g__Sporofaciens;s__	0	8	0	0	34	84	89	0	0	0	0	0	0	0	0	0	0	0	0	0	0	0	0	0	0	0	0	0	0	0	0	0	0	0	0	0	0	0	0	0	0	0	0	0	0
d__Bacteria;p__Bacillota_A_368345;c__Clostridia_258483;o__Lachnospirales;f__Lachnospiraceae;g__Limivivens;s__	0	0	0	0	0	0	0	0	0	0	0	6	0	4	7	4	7	0	43	0	0	6	54	13	52	0	0	0	0	0	0	0	0	0	0	0	0	13	0	0	0	0	0	0	0
d__Bacteria;p__Cyanobacteriota;c__Vampirovibrionia;o__Gastranaerophilales;f__Gastranaerophilaceae;g__;s__	0	3	0	0	6	0	8	0	0	0	0	19	23	0	0	0	0	0	0	0	3	0	0	9	0	0	0	121	0	0	2	0	0	0	0	0	0	0	0	0	0	0	10	7	0
d__Bacteria;p__Bacillota_A_368345;c__Clostridia_258483;o__Lachnospirales;f__Anaerotignaceae;g__;s__	0	0	0	0	8	0	17	74	0	0	0	0	23	0	0	0	0	0	0	0	0	0	0	0	0	14	0	20	0	0	0	0	0	14	0	0	22	30	0	16	0	28	8	0	0
d__Bacteria;p__Bacillota_A_368345;c__Clostridia_258483;o__Oscillospirales;f__Ruminococcaceae;g__UBA946;s__	0	0	0	0	0	0	0	0	0	0	0	0	0	0	0	0	0	0	0	0	0	0	0	0	0	0	0	0	0	0	0	0	0	0	0	0	0	0	0	0	0	0	186	7	0
d__Bacteria;p__Bacillota_A_368345;c__Clostridia_258483;o__Lachnospirales;f__Lachnospiraceae;g__Suilimivivens;s__Suilimivivens aceti	0	0	0	0	0	0	0	0	0	192	0	0	0	0	0	0	0	0	0	0	0	0	0	0	0	0	0	0	0	0	0	0	0	0	0	0	0	0	0	0	0	0	0	0	0
d__Bacteria;p__Bacillota_A_368345;c__Clostridia_258483;o__Oscillospirales;f__Acutalibacteraceae;g__UMGS1071;s__UMGS1071 sp900548305	123	0	0	0	0	0	0	0	0	0	61	0	0	0	0	0	0	0	0	0	0	0	0	0	0	0	0	0	0	0	0	0	0	0	0	0	0	0	0	0	0	0	0	0	0
d__Bacteria;p__Bacillota_A_368345;c__Clostridia_258483;o__Oscillospirales;f__Oscillospiraceae_88309;g__Lawsonibacter;s__Lawsonibacter sp000177015	0	0	0	0	41	0	0	0	0	0	0	0	0	0	0	0	0	0	0	0	0	0	0	0	0	0	106	20	0	0	17	0	0	0	0	0	0	0	0	0	0	0	0	0	0
d__Bacteria;p__Bacillota_I;c__Bacilli_A;o__Bacillales_A;f__Planococcaceae;g__Lysinibacillus_304693;s__	0	0	0	0	0	0	0	0	0	0	177	0	0	0	0	0	0	0	0	0	0	0	0	0	3	0	0	0	0	0	0	0	0	0	0	0	0	0	0	0	0	0	0	0	0
d__Bacteria;p__Bacillota_A_368345;c__Clostridia_258483;o__Eubacteriales;f__Anaerofustaceae;g__Anaerofustis;s__Anaerofustis stercorihominis	0	9	0	10	0	11	0	4	14	8	0	0	0	4	9	0	0	0	0	13	0	11	36	4	24	0	0	0	0	0	0	0	0	0	11	0	0	4	0	3	0	0	5	0	12
d__Bacteria;p__Bacillota_I;c__Bacilli_A;o__Lactobacillales;f__Enterococcaceae;g__Enterococcus_D;s__	29	0	0	0	0	0	0	0	0	0	0	0	0	0	0	0	0	0	53	0	0	0	0	0	0	0	0	0	0	0	0	0	0	0	31	64	0	0	0	0	0	0	0	0	0
d__Bacteria;p__Bacillota_A_368345;c__Clostridia_258483;o__Oscillospirales;f__Ruminococcaceae;g__Bittarella;s__Bittarella massiliensis	0	9	7	17	0	2	0	0	6	9	12	2	2	10	4	0	0	6	0	0	0	14	0	0	0	0	0	0	6	0	0	4	0	14	0	0	2	11	0	15	0	12	0	0	11
d__Bacteria;p__Bacillota_A_368345;c__Clostridia_258483;o__Oscillospirales;f__Ruminococcaceae;g__Anaerotruncus;s__	0	0	0	0	0	0	0	0	0	0	0	0	0	0	0	0	25	0	0	0	62	0	23	0	0	0	0	0	0	0	0	0	0	0	0	0	0	0	0	0	0	0	0	57	0
d__Bacteria;p__Bacillota_A_368345;c__Clostridia_258483;o__Oscillospirales;f__Ruminococcaceae;g__Negativibacillus;s__	0	0	0	0	0	0	0	0	0	0	0	0	0	0	15	0	0	0	5	0	13	18	12	0	17	0	0	0	65	0	0	18	0	12	0	0	0	0	0	0	0	0	0	15	0
d__Bacteria;p__Bacillota_I;c__Bacilli_A;o__Lactobacillales;f__Enterococcaceae;g__Enterococcus_A;s__Enterococcus_A avium	16	0	0	0	0	10	0	0	0	0	0	0	0	23	0	74	0	0	0	0	0	21	15	2	0	0	0	0	0	0	0	0	30	0	0	78	0	6	23	0	0	0	0	0	0
d__Bacteria;p__Bacillota_A_368345;c__Clostridia_258483;o__Oscillospirales;f__Ruminococcaceae;g__Pygmaiobacter;s__Anaerofilum agile	10	0	0	0	0	8	0	44	40	0	54	0	0	0	0	0	0	0	0	0	0	0	0	0	0	0	0	0	0	0	0	0	0	0	0	0	0	0	0	0	0	0	0	0	0
d__Bacteria;p__Bacillota_A_368345;c__Clostridia_258483;o__Lachnospirales;f__Lachnospiraceae;g__MD308;s__	0	0	0	0	0	0	0	0	0	0	0	15	8	0	6	12	0	0	0	0	0	0	0	0	0	29	24	53	16	0	0	0	5	0	0	0	0	0	0	25	0	0	0	0	0
d__Bacteria;p__Bacillota_I;c__Bacilli_A;o__Erysipelotrichales;f__Erysipelotrichaceae;g__Holdemania;s__Holdemania sp900120005	0	9	0	43	7	0	0	29	33	0	191	0	0	0	0	0	0	0	0	0	0	0	0	0	0	0	0	0	0	0	0	0	0	0	0	0	0	0	0	0	0	0	0	0	0
d__Bacteria;p__Bacillota_A_368345;c__Clostridia_258483;o__Peptostreptococcales;f__Peptostreptococcaceae_256921;g__Romboutsia_E;s__	0	0	0	35	0	0	0	0	0	0	103	0	0	0	0	0	0	0	0	0	0	0	0	0	0	0	0	0	0	0	0	0	0	0	0	0	0	0	0	0	0	0	0	0	0
d__Bacteria;p__Actinomycetota;c__Coriobacteriia;o__Coriobacteriales;f__Eggerthellaceae;g__CAAEEV01;s__Adlercreutzia_A_404199 muris	0	20	0	0	0	0	0	0	0	0	0	0	0	0	0	0	0	0	0	0	0	67	0	0	0	0	0	0	0	0	0	0	6	0	0	0	0	0	0	26	0	9	5	0	0
d__Bacteria;p__Bacillota_I;c__Bacilli_A;o__Lactobacillales;f__Enterococcaceae;g__Enterococcus_D;s__Enterococcus_D casseliflavus	0	0	0	0	0	0	6	0	0	0	0	0	12	0	0	0	0	0	0	0	2	0	0	6	0	0	0	0	0	0	0	0	0	0	36	103	0	0	0	0	0	0	0	0	0
d__Bacteria;p__Bacillota_A_368345;c__Clostridia_258483;o__Lachnospirales;f__Lachnospiraceae;g__Brotaphodocola;s__	0	0	0	0	0	0	0	0	0	0	0	0	0	0	0	0	0	0	0	0	0	0	0	0	0	122	0	0	0	0	0	0	0	0	0	0	0	0	0	0	0	0	0	0	0
d__Bacteria;p__Bacillota_A_368345;c__Clostridia_258483;o__Oscillospirales;f__Ruminococcaceae;g__Merdimmobilis;s__	0	0	0	0	0	0	0	0	0	0	0	5	0	0	0	0	0	0	0	0	0	0	0	0	0	33	27	20	0	3	13	10	0	0	0	0	8	0	0	0	0	0	0	0	0
d__Bacteria;p__Bacillota_A_368345;c__Clostridia_258483;o__Christensenellales;f__Borkfalkiaceae;g__Borkfalkia;s__	0	0	0	0	0	0	0	4	2	2	35	3	22	2	0	0	0	3	2	0	21	0	0	62	0	8	0	0	0	0	0	2	0	3	0	0	0	0	0	0	8	0	4	0	6
d__Bacteria;p__Bacillota_A_368345;c__Clostridia_258483;o__Oscillospirales;f__Ruminococcaceae;g__Angelakisella;s__Angelakisella massiliensis	0	23	0	11	61	7	20	0	0	32	0	0	0	0	0	0	3	0	0	0	0	0	0	0	0	21	35	31	0	29	0	0	0	0	0	0	7	0	0	5	0	0	0	0	0
d__Bacteria;p__Bacillota_A_368345;c__Clostridia_258483;o__Oscillospirales;f__Butyricicoccaceae;g__Butyricicoccus_A_77030;s__Butyricicoccus_A_77030 pullicaecorum	0	0	0	0	0	0	0	0	0	0	0	0	0	0	0	0	0	0	0	0	0	0	0	0	0	82	0	72	0	0	0	0	0	0	0	0	0	0	0	0	0	0	0	0	0
d__Bacteria;p__Bacillota_A_368345;c__Clostridia_258483;o__Christensenellales;f__CAG-138;g__CAG-1024;s__	0	7	13	0	18	0	0	0	0	0	0	3	12	0	0	0	0	0	6	3	0	0	0	18	0	0	0	0	0	8	3	0	0	4	0	0	0	2	0	0	0	0	4	7	0
d__Bacteria;p__Bacillota_A_368345;c__Clostridia_258483;o__Lachnospirales;f__;g__;s__	0	10	0	0	19	35	0	0	0	0	0	10	0	0	0	0	0	4	11	0	0	4	0	0	0	3	22	0	0	0	6	0	0	0	0	0	3	10	0	0	0	0	0	0	0
d__Bacteria;p__Bacillota_A_368345;c__Clostridia_258483;o__Lachnospirales;f__Lachnospiraceae;g__Lactonifactor;s__	0	0	0	0	0	0	0	0	0	0	0	0	0	0	0	0	0	0	0	104	0	0	0	0	0	0	0	0	0	0	0	0	0	0	0	0	0	0	0	0	0	0	0	0	0
d__Bacteria;p__Bacteroidota;c__Bacteroidia;o__Bacteroidales;f__Bacteroidaceae;g__Prevotella;s__	0	0	0	0	0	9	0	0	0	0	0	0	4	0	0	0	0	0	0	0	0	31	0	0	0	10	11	15	0	4	0	0	0	0	0	0	9	0	11	0	0	0	0	0	0
d__Bacteria;p__Bacillota_A_368345;c__Clostridia_258483;o__Lachnospirales;f__Anaerotignaceae;g__Coprocola;s__	0	2	0	0	0	0	0	0	0	0	0	0	16	17	9	6	0	0	0	0	0	10	0	0	0	12	4	33	9	0	0	5	0	0	50	0	0	0	12	3	0	0	3	0	0
d__Bacteria;p__Bacillota_I;c__Bacilli_A;o__Staphylococcales;f__Staphylococcaceae;g__Staphylococcus;s__Staphylococcus ureilyticus	0	18	0	18	0	19	0	0	21	5	0	0	0	0	0	0	0	0	0	0	0	0	0	0	3	0	0	0	0	0	0	0	2	2	0	4	0	0	0	0	0	0	0	0	0
d__Bacteria;p__Bacillota_I;c__Bacilli_A;o__Staphylococcales;f__Salinicoccaceae;g__Jeotgalicoccus_A_310962;s__Jeotgalicoccus_A_310962 aerolatus	0	9	0	0	0	8	0	8	10	0	0	0	0	0	0	0	0	0	0	0	0	0	0	0	0	0	0	0	0	28	0	0	7	0	3	2	0	0	0	8	10	0	0	0	0
d__Bacteria;p__Bacillota_A_368345;c__Clostridia_258483;o__Lachnospirales;f__Lachnospiraceae;g__COE1;s__	0	0	0	0	0	0	0	163	0	0	0	0	0	0	0	0	5	0	0	0	0	0	37	0	0	0	0	0	0	0	0	0	6	26	0	0	0	0	0	0	0	0	0	0	0
d__Bacteria;p__Bacillota_A_368345;c__Clostridia_258483;o__Oscillospirales;f__CAG-272;g__Avispirillum;s__	0	0	0	0	0	0	0	0	0	0	0	0	0	0	0	0	0	0	2	0	0	0	0	5	0	9	9	13	0	0	6	5	0	0	0	0	16	0	0	0	0	0	9	7	0
d__Bacteria;p__Bacillota_A_368345;c__Clostridia_258483;o__Oscillospirales;f__Oscillospiraceae_88309;g__Dysosmobacter;s__Dysosmobacter welbionis	0	0	0	0	0	0	0	17	0	0	0	0	0	0	0	0	0	0	0	0	0	0	0	0	0	0	0	0	0	0	0	0	0	0	0	0	0	0	0	0	0	63	0	0	0
d__Bacteria;p__Pseudomonadota;c__Gammaproteobacteria;o__Enterobacterales_737866;f__Enterobacteriaceae_A_725029;g__Escherichia;s__Shigella dysenteriae	74	0	0	0	0	0	0	0	0	0	0	0	0	0	0	0	0	0	0	0	0	0	0	0	0	0	0	0	0	0	0	0	0	0	0	0	0	0	0	0	0	0	0	0	0
d__Bacteria;p__Bacillota_A_368345;c__Clostridia_258483;o__Oscillospirales;f__Acutalibacteraceae;g__UBA5905;s__UBA5905 sp002437905	0	0	0	0	0	0	0	36	19	16	0	0	0	0	0	0	0	0	0	0	0	0	0	0	0	0	0	0	0	0	0	0	0	0	0	0	0	0	0	0	0	0	0	0	0
d__Bacteria;p__Bacillota_A_368345;c__Clostridia_258483;o__Christensenellales;f__GCA-900066905;g__Luoshenia;s__Luoshenia tenuis	0	4	0	9	0	0	0	0	0	0	0	0	0	0	0	0	0	13	23	0	0	0	0	0	0	0	0	0	0	0	0	9	0	0	3	0	0	0	0	9	0	0	0	0	0
d__Bacteria;p__Bacillota_A_368345;c__Clostridia_258483;o__Oscillospirales;f__Ruminococcaceae;g__Anaerotruncus;s__Anaerotruncus sp003612625	0	0	0	12	0	0	0	0	0	0	0	0	0	0	0	0	0	0	0	0	0	0	0	0	0	0	0	0	0	0	0	0	0	10	0	0	0	0	0	0	0	0	76	0	0
d__Bacteria;p__Bacillota_A_368345;c__Clostridia_258483;o__Lachnospirales;f__Lachnospiraceae;g__Scatomonas;s__Scatomonas hejianensis	0	22	25	10	0	0	0	10	0	0	0	0	0	0	0	0	0	0	0	0	0	0	0	0	0	0	0	0	0	0	0	0	0	0	0	0	0	0	0	0	0	0	0	0	0
d__Bacteria;p__Bacillota_A_368345;c__Clostridia_258483;o__TANB77;f__CAG-508;g__CAG-793;s__	0	0	0	0	0	0	0	0	0	0	0	0	0	0	0	0	0	0	0	0	0	0	0	0	0	4	62	0	0	0	0	0	0	0	0	0	0	0	0	0	0	0	0	0	0
d__Bacteria;p__Bacillota_A_368345;c__Clostridia_258483;o__Lachnospirales;f__Lachnospiraceae;g__;s__	0	0	0	0	0	8	4	0	23	2	0	0	0	0	0	0	0	11	4	0	6	0	0	0	4	0	0	3	0	0	0	0	0	0	2	0	0	31	0	0	0	0	0	4	0
d__Bacteria;p__Bacillota_A_368345;c__Clostridia_258483;o__Christensenellales;f__Christensenellaceae;g__;s__	0	0	0	0	0	9	0	0	0	0	0	0	0	0	0	0	0	11	0	0	0	0	0	0	0	0	0	0	0	4	0	0	0	0	3	0	5	7	6	0	0	8	0	2	8
d__Bacteria;p__Bacillota_G;c__DTU014;o__DTU014;f__DTU014;g__DTU014;s__	0	0	0	0	26	0	0	0	0	0	0	0	0	0	0	0	18	27	0	0	0	0	0	11	0	0	0	0	0	0	0	0	0	0	0	0	0	0	0	0	7	0	0	0	0
d__Bacteria;p__Bacillota_A_368345;c__Clostridia_258483;o__Lachnospirales;f__Lachnospiraceae;g__Anaerostipes;s__Anaerostipes caccae	0	0	0	0	0	0	0	0	15	0	0	0	0	9	10	0	4	4	0	0	0	0	0	0	0	0	0	0	0	0	0	0	5	0	3	2	0	0	7	0	0	0	0	0	7
d__Bacteria;p__Bacillota_A_368345;c__Clostridia_258483;o__Lachnospirales;f__Lachnospiraceae;g__AF33-28;s__AF33-28 sp003477885	0	0	0	2	0	0	0	0	0	0	16	0	0	0	14	0	0	7	13	0	0	4	0	0	0	0	0	0	0	0	0	5	0	6	0	0	0	0	0	0	0	8	0	0	0
d__Bacteria;p__Bacillota_A_368345;c__Clostridia_258483;o__Oscillospirales;f__Acutalibacteraceae;g__RUG762;s__	0	0	0	0	0	0	0	0	0	0	0	0	29	0	0	0	0	0	0	0	0	0	0	0	0	0	0	0	0	22	0	0	0	0	0	0	0	0	0	0	0	0	0	0	0
d__Bacteria;p__Actinomycetota;c__Coriobacteriia;o__Coriobacteriales;f__Eggerthellaceae;g__CAAEEV01;s__	0	0	0	0	0	0	0	0	0	0	0	0	0	0	0	0	0	0	0	0	0	0	0	0	0	0	0	0	0	0	0	0	0	0	0	0	0	0	0	30	0	0	0	4	15
d__Bacteria;p__Bacillota_A_368345;c__Clostridia_258483;o__Lachnospirales;f__Lachnospiraceae;g__Enterocloster;s__	0	0	0	0	0	3	0	0	46	0	0	11	0	0	0	0	0	0	0	0	0	0	0	0	0	0	0	0	0	0	0	0	0	0	0	0	0	0	0	7	0	0	0	0	0
d__Bacteria;p__Bacillota_A_368345;c__Clostridia_258483;o__Lachnospirales;f__Lachnospiraceae;g__Porcincola;s__	0	0	0	0	11	0	0	0	0	0	0	0	0	0	0	0	0	0	0	0	0	0	0	0	0	16	0	0	0	0	7	0	0	0	0	0	7	0	0	0	0	0	0	0	0
d__Bacteria;p__Bacillota_A_368345;c__Clostridia_258483;o__Oscillospirales;f__CAG-382;g__SFLA01;s__SFLA01 sp004553575	0	0	0	0	0	0	0	0	0	0	0	0	0	0	0	0	0	39	0	0	0	0	0	0	0	0	0	0	0	0	0	0	0	0	0	0	0	0	0	0	0	0	0	0	0
d__Bacteria;p__Bacillota_A_368345;c__Clostridia_258483;o__Lachnospirales;f__Lachnospiraceae;g__Cuneatibacter;s__Cuneatibacter caecimuris	0	0	0	0	0	0	0	0	0	0	38	0	0	0	0	0	0	0	0	0	0	0	0	0	0	0	0	0	0	0	0	0	0	0	0	0	0	0	0	0	0	0	0	0	0
d__Bacteria;p__Bacillota_A_368345;c__Clostridia_258483;o__Clostridiales;f__Clostridiaceae_222000;g__Dwaynesavagella;s__Dwaynesavagella sp000283555	0	0	0	0	0	0	0	0	0	0	0	0	0	0	0	0	0	0	0	0	0	20	0	0	0	0	0	3	0	0	0	0	0	0	0	0	6	0	0	0	0	4	4	0	0
d__Bacteria;p__Pseudomonadota;c__Gammaproteobacteria;o__Pseudomonadales_A_660879;f__Moraxellaceae;g__Acinetobacter;s__Acinetobacter johnsonii	0	0	0	0	11	0	0	0	0	0	0	0	0	0	0	0	0	0	0	0	0	0	0	0	0	0	0	0	0	0	0	0	0	0	8	0	0	17	0	18	0	0	2	0	0
d__Bacteria;p__Bacillota_I;c__Bacilli_A;o__Erysipelotrichales;f__Erysipelotrichaceae;g__Dubosiella;s__Dubosiella newyorkensis	0	0	21	0	0	0	0	0	0	0	16	0	0	0	0	0	0	0	0	0	0	0	0	0	0	0	0	0	0	0	0	0	0	0	0	0	0	0	0	0	0	0	0	0	0
d__Bacteria;p__Bacillota_A_368345;c__Clostridia_258483;o__Peptostreptococcales;f__Anaerovoracaceae;g__RUG11894;s__	0	0	0	0	31	0	0	0	0	0	0	0	0	0	0	0	0	0	0	0	0	0	0	0	0	3	0	3	0	0	0	0	0	0	0	0	0	0	0	0	0	0	0	0	0
d__Bacteria;p__Bacillota_A_368345;c__Clostridia_258483;o__Christensenellales;f__;g__;s__	0	2	2	7	3	0	0	0	0	8	0	0	9	0	4	4	0	8	0	0	7	0	0	3	4	0	3	0	4	5	0	0	0	0	0	0	0	0	0	0	7	0	0	0	0
d__Bacteria;p__Bacillota_A_368345;c__Clostridia_258483;o__Christensenellales;f__CAG-314;g__CAG-314;s__CAG-314 sp900551395	0	0	0	0	0	0	0	0	0	0	0	0	16	0	0	0	0	0	0	0	0	0	0	0	0	0	0	0	0	0	5	2	0	0	0	0	0	0	0	0	11	0	0	0	0
d__Bacteria;p__Bacillota_I;c__Bacilli_A;o__Staphylococcales;f__Staphylococcaceae;g__Staphylococcus;s__Staphylococcus xylosus	0	0	0	28	0	0	0	0	0	0	0	0	0	0	0	0	0	0	0	0	0	0	0	0	0	0	0	0	0	0	0	0	0	0	0	0	0	0	0	2	0	0	0	0	0
d__Bacteria;p__Bacillota_A_368345;c__Clostridia_258483;o__TANB77;f__CAG-508;g__CAG-269;s__	0	0	0	6	0	24	6	0	0	0	0	30	0	0	0	0	0	0	0	0	0	0	0	0	0	0	0	0	0	0	9	0	0	0	0	0	0	0	0	0	0	0	0	0	0
d__Bacteria;p__Pseudomonadota;c__Gammaproteobacteria;o__Pseudomonadales_A_660879;f__Moraxellaceae;g__Acinetobacter;s__Acinetobacter pittii	0	0	0	0	0	0	0	0	0	0	0	0	0	0	3	0	0	26	0	0	0	0	0	0	0	0	0	0	0	0	0	0	0	0	0	0	0	0	0	0	0	0	0	0	0
d__Bacteria;p__Bacillota_A_368345;c__Clostridia_258483;o__Lachnospirales;f__Lachnospiraceae;g__Laedolimicola;s__	0	0	0	0	0	0	0	0	0	0	0	5	0	0	0	0	0	0	0	0	0	0	0	9	0	4	0	0	0	0	0	0	0	0	0	0	0	4	0	0	0	0	7	0	0
d__Bacteria;p__Pseudomonadota;c__Gammaproteobacteria;o__Enterobacterales_737866;f__Enterobacteriaceae_A_725029;g__Escherichia;s__Shigella sonnei	29	0	0	0	0	0	0	0	0	0	0	0	0	0	0	0	0	0	0	0	0	0	0	0	0	0	0	0	0	0	0	0	0	0	0	0	0	0	0	0	0	0	0	0	0
d__Bacteria;p__Actinomycetota;c__Actinomycetes;o__Mycobacteriales;f__Mycobacteriaceae;g__Corynebacterium;s__Corynebacterium stationis	12	0	0	0	0	4	0	0	0	0	0	0	0	0	0	0	0	0	0	0	0	0	0	0	17	0	0	0	0	0	0	0	0	0	0	0	0	0	0	0	0	0	0	0	0
d__Bacteria;p__Bacillota_I;c__Bacilli_A;o__Lactobacillales;f__Carnobacteriaceae;g__Carnobacterium_A_320617;s__Carnobacterium_A_320617 maltaromaticum	0	0	0	0	0	0	0	0	0	0	0	0	0	0	0	0	0	0	0	0	0	0	0	0	0	0	0	0	0	0	0	11	12	0	0	0	0	5	0	0	0	0	0	0	0
d__Bacteria;p__Bacillota_A_368345;c__Clostridia_258483;o__Oscillospirales;f__Oscillospiraceae_88309;g__UBA2658;s__UBA2658 sp009929315	0	3	0	0	0	0	0	0	0	6	0	0	0	0	0	5	0	0	3	0	0	0	0	0	3	0	0	0	0	0	0	0	0	0	0	0	0	0	0	0	6	0	2	0	0
d__Bacteria;p__Bacillota_I;c__Bacilli_A;o__Bacillales_A;f__Planococcaceae;g__Sporosarcina;s__Sporosarcina ureilytica	0	0	0	0	0	0	0	3	3	30	0	0	0	0	0	0	0	0	0	0	0	0	0	0	0	0	0	0	0	0	0	0	0	0	0	0	0	0	0	0	0	0	0	0	0
d__Bacteria;p__Bacillota_A_368345;c__Clostridia_258483;o__Oscillospirales;f__Acutalibacteraceae;g__Acutalibacter;s__Acutalibacter timonensis	0	0	0	0	14	0	0	0	0	0	0	0	0	0	0	0	0	0	13	0	0	0	0	0	0	0	0	0	0	0	0	0	0	0	0	0	0	0	0	0	0	0	0	0	0
d__Bacteria;p__Actinomycetota;c__Coriobacteriia;o__Coriobacteriales;f__Eggerthellaceae;g__Xiamenia;s__Xiamenia xianingshaonis	0	0	0	0	0	0	0	0	0	0	0	0	0	0	0	0	0	0	0	0	0	0	0	0	15	0	0	0	0	0	0	0	4	0	0	0	0	3	0	0	0	7	0	0	0
d__Bacteria;p__Bacillota_I;c__Bacilli_A;o__Lactobacillales;f__Streptococcaceae;g__Lactococcus_A_346120;s__	0	0	0	0	0	0	0	0	6	0	0	0	0	11	2	0	0	0	0	0	0	0	0	0	2	0	0	0	0	0	0	0	0	0	0	3	0	0	0	2	0	0	0	0	0
d__Bacteria;p__Bacillota_A_368345;c__Clostridia_258483;o__Lachnospirales;f__Lachnospiraceae;g__Butyribacter;s__Butyribacter intestini	0	0	0	0	0	0	0	0	0	0	0	0	0	0	0	0	0	0	0	0	0	0	0	0	0	0	0	25	0	0	0	0	0	0	0	0	0	0	0	0	0	0	0	0	0
d__Bacteria;p__Bacillota_A_368345;c__Clostridia_258483;o__Lachnospirales;f__Lachnospiraceae;g__Blautia_A_141781;s__	0	0	0	0	0	0	0	0	0	0	0	0	0	0	0	0	0	0	0	24	0	0	22	0	0	0	0	0	0	0	0	0	0	0	0	0	0	0	0	0	14	0	0	0	0
d__Bacteria;p__Bacillota_I;c__Bacilli_A;o__Erysipelotrichales;f__Erysipelotrichaceae;g__Holdemania;s__	0	0	0	5	0	0	0	0	0	0	0	0	0	0	0	0	0	0	0	0	0	0	0	0	0	0	0	0	0	5	0	0	0	0	12	0	0	0	0	0	0	0	0	0	0
d__Bacteria;p__Bacillota_A_368345;c__Clostridia_258483;o__Christensenellales;f__CAG-917;g__CAG-475;s__CAG-475 sp900548005	0	0	0	0	22	0	0	0	0	0	0	0	0	0	0	0	0	0	0	0	0	0	0	0	0	0	0	0	0	0	0	0	0	0	0	0	0	0	0	0	0	0	0	0	0
d__Bacteria;p__Bacillota_A_368345;c__Clostridia_258483;o__Oscillospirales;f__Ruminococcaceae;g__Massiliimalia;s__	0	0	0	0	21	0	0	0	0	0	0	0	0	0	0	0	0	0	0	0	0	0	0	0	0	0	0	0	0	0	0	0	0	0	0	0	0	0	0	0	0	0	0	0	0
d__Bacteria;p__Actinomycetota;c__Coriobacteriia;o__Coriobacteriales;f__Eggerthellaceae;g__Adlercreutzia_A_404257;s__Adlercreutzia_A_404257 mucosicola	0	0	0	0	0	0	0	0	0	0	0	0	0	0	0	0	0	0	0	0	0	0	0	0	12	0	0	0	0	0	0	0	0	0	0	0	0	0	0	0	8	0	0	0	0
d__Bacteria;p__Bacillota_A_368345;c__Clostridia_258483;o__Oscillospirales;f__Acutalibacteraceae;g__Solibaculum;s__	0	0	0	0	0	0	0	0	0	0	0	0	0	0	0	0	0	0	0	0	0	0	0	0	0	0	0	0	0	0	0	0	0	0	0	0	0	0	13	0	4	0	0	0	0
d__Bacteria;p__Bacillota_I;c__Bacilli_A;o__Lactobacillales;f__Aerococcaceae;g__Ruoffia;s__	0	0	0	0	0	0	0	0	0	0	4	0	0	0	0	0	0	0	0	0	0	0	0	0	13	0	0	0	0	0	0	0	0	0	0	0	0	0	0	0	0	0	0	0	0
d__Bacteria;p__Bacillota_A_368345;c__Clostridia_258483;o__Lachnospirales;f__Anaerotignaceae;g__Coprocola;s__Coprocola sp000364165	0	0	0	0	0	0	0	0	0	0	0	0	0	0	0	0	0	0	0	0	0	0	0	0	0	0	0	0	0	0	0	0	14	0	0	0	0	0	0	0	0	0	0	0	0
d__Bacteria;p__Bacillota_I;c__Bacilli_A;o__Lactobacillales;f__Streptococcaceae;g__Streptococcus;s__Streptococcus sp004570525	0	0	0	7	0	4	0	0	0	3	0	0	0	0	0	0	0	2	0	0	0	0	0	0	0	0	0	0	0	0	0	0	0	0	0	0	0	0	0	0	0	0	0	0	0
d__Bacteria;p__Bacillota_A_368345;c__Clostridia_258483;o__Oscillospirales;f__Ruminococcaceae;g__Soleaferrea;s__Soleaferrea massiliensis	0	6	0	7	0	6	0	0	0	0	0	0	0	0	0	0	0	0	0	0	2	0	0	0	0	0	0	4	0	0	0	0	0	0	0	0	0	0	0	0	0	0	0	0	0
d__Bacteria;p__Bacillota_A_368345;c__Clostridia_258483;o__Lachnospirales;f__Lachnospiraceae;g__Suilimivivens;s__Suilimivivens sp009917455	0	0	0	0	13	0	0	0	0	0	0	0	0	0	0	0	0	0	0	0	0	0	0	0	0	0	0	0	0	0	0	0	0	0	0	0	0	0	0	0	0	0	0	0	0
d__Bacteria;p__Bacillota_A_368345;c__Clostridia_258483;o__Oscillospirales;f__Oscillospiraceae_88309;g__Lawsonibacter;s__Lawsonibacter asaccharolyticus	0	0	0	0	0	0	0	13	0	0	0	0	0	0	0	0	0	0	0	0	0	0	0	0	0	0	0	0	0	0	0	0	0	0	0	0	0	0	0	0	0	0	0	0	0
d__Bacteria;p__Actinomycetota;c__Actinomycetes;o__Mycobacteriales;f__Mycobacteriaceae;g__Corynebacterium;s__Corynebacterium deserti	0	0	0	0	0	6	0	3	0	0	6	0	0	0	0	0	0	0	0	0	0	0	0	0	0	0	0	0	0	0	0	0	0	0	0	0	0	0	0	3	0	0	0	0	0
d__Bacteria;p__Bacillota_A_368345;c__Clostridia_258483;o__Lachnospirales;f__Lachnospiraceae;g__Extibacter;s__Extibacter muris	0	0	0	0	0	0	0	11	0	0	0	0	0	0	0	0	0	0	0	0	0	0	0	0	0	0	0	0	0	0	0	0	0	0	0	0	0	0	0	0	0	0	0	0	0
d__Bacteria;p__Bacillota_A_368345;c__Clostridia_258483;o__Oscillospirales;f__Ruminococcaceae;g__Ruthenibacterium;s__	0	0	0	0	0	0	0	0	0	0	0	0	0	0	0	0	0	0	0	0	0	0	10	0	0	0	0	0	0	0	0	0	0	0	0	0	0	0	0	0	0	0	0	0	0
d__Bacteria;p__Bacillota_A_368345;c__Clostridia_258483;o__Lachnospirales;f__Lachnospiraceae;g__Enterocloster;s__Enterocloster citroniae	0	0	0	0	0	0	0	0	0	0	0	0	0	0	0	0	0	0	0	0	0	0	0	0	0	0	0	0	9	0	0	0	0	0	0	0	0	0	0	0	0	0	0	0	0
d__Bacteria;p__Pseudomonadota;c__Alphaproteobacteria;o__Rhizobiales_505101;f__Rhizobiaceae;g__Agrobacterium;s__	0	0	0	0	0	0	0	0	0	0	0	0	0	0	0	0	0	0	0	0	0	0	9	0	0	0	0	0	0	0	0	0	0	0	0	0	0	0	0	0	0	0	0	0	0
d__Bacteria;p__Actinomycetota;c__Coriobacteriia;o__Coriobacteriales;f__Eggerthellaceae;g__Parvibacter;s__Parvibacter caecicola	0	0	0	0	0	0	0	0	0	0	0	0	0	0	0	0	0	0	0	0	0	0	0	0	0	0	0	0	0	0	4	4	0	0	0	0	0	0	0	0	0	0	0	0	0
d__Bacteria;p__Bacillota_I;c__Bacilli_A;o__Staphylococcales;f__Staphylococcaceae;g__Staphylococcus;s__	0	0	0	0	0	0	0	0	0	0	0	0	0	0	0	0	0	0	0	0	0	0	0	0	0	2	6	0	0	0	0	0	0	0	0	0	0	0	0	0	0	0	0	0	0
d__Bacteria;p__Bacillota_I;c__Bacilli_A;o__Staphylococcales;f__Staphylococcaceae;g__Mammaliicoccus_319278;s__Mammaliicoccus lentus	0	0	0	0	0	0	0	5	0	0	3	0	0	0	0	0	0	0	0	0	0	0	0	0	0	0	0	0	0	0	0	0	0	0	0	0	0	0	0	0	0	0	0	0	0
d__Bacteria;p__Cyanobacteriota;c__Vampirovibrionia;o__Gastranaerophilales;f__Gastranaerophilaceae;g__Stercorousia;s__	0	0	0	0	0	6	0	0	0	8	0	0	0	0	0	0	0	0	0	0	0	0	0	0	0	0	0	0	0	0	0	0	0	0	0	0	0	0	0	0	0	0	0	0	0
d__Bacteria;p__Bacillota_I;c__Bacilli_A;o__Bacillales_G_286828;f__Fictibacillaceae_286828;g__Fictibacillus_C;s__Fictibacillus_C marinisediminis	0	0	0	0	0	0	0	0	0	0	0	0	0	0	0	0	0	0	0	0	0	8	0	0	0	0	0	0	0	0	0	0	0	0	0	0	0	0	0	0	0	0	0	0	0
d__Bacteria;p__Pseudomonadota;c__Gammaproteobacteria;o__Pseudomonadales_A_660879;f__Moraxellaceae;g__Acinetobacter;s__Acinetobacter bereziniae	0	0	0	0	0	0	0	0	0	0	0	0	0	0	0	0	0	0	0	0	0	8	0	0	0	0	0	0	0	0	0	0	0	0	0	0	0	0	0	0	0	0	0	0	0
d__Bacteria;p__Bacillota_I;c__Bacilli_A;o__Lactobacillales;f__Streptococcaceae;g__Streptococcus;s__Streptococcus thermophilus	0	0	0	0	0	0	0	0	0	0	0	0	0	0	0	0	0	5	0	0	0	0	0	0	2	0	0	0	0	0	0	0	0	0	0	0	0	0	0	0	0	0	0	0	0
d__Bacteria;p__Bacillota_A_368345;c__Clostridia_258483;o__Clostridiales;f__Clostridiaceae_222000;g__Clostridium_J;s__Clostridium_J culturomicium	0	0	0	0	0	0	0	0	0	0	0	0	0	0	0	0	0	0	0	0	0	0	0	0	0	0	0	0	0	0	0	0	0	0	0	0	0	0	6	0	0	0	0	0	0
d__Bacteria;p__Bacillota_A_368345;c__Clostridia_258483;o__Lachnospirales;f__Lachnospiraceae;g__COE1;s__COE1 sp000403335	0	0	0	0	0	0	0	6	0	0	0	0	0	0	0	0	0	0	0	0	0	0	0	0	0	0	0	0	0	0	0	0	0	0	0	0	0	0	0	0	0	0	0	0	0
d__Bacteria;p__Bacillota_I;c__Bacilli_A;o__Lactobacillales;f__Carnobacteriaceae;g__Atopostipes;s__Atopostipes suicloacalis	0	0	0	0	0	0	0	0	3	3	0	0	0	0	0	0	0	0	0	0	0	0	0	0	0	0	0	0	0	0	0	0	0	0	0	0	0	0	0	0	0	0	0	0	0
d__Bacteria;p__Bacillota_I;c__Bacilli_A;o__Lactobacillales;f__Streptococcaceae;g__Streptococcus;s__Streptococcus mutans	0	3	0	0	0	0	0	0	3	0	0	0	0	0	0	0	0	0	0	0	0	0	0	0	0	0	0	0	0	0	0	0	0	0	0	0	0	0	0	0	0	0	0	0	0
d__Bacteria;p__Bacillota_A_368345;c__Clostridia_258483;o__Peptostreptococcales;f__Filifactoraceae;g__Proteocatella_235811;s__Proteocatella sp009929415	0	0	0	0	0	4	0	0	0	0	0	0	0	0	2	0	0	0	0	0	0	0	0	0	0	0	0	0	0	0	0	0	0	0	0	0	0	0	0	0	0	0	0	0	0
d__Bacteria;p__Bacillota_A_368345;c__Clostridia_258483;o__Oscillospirales;f__Acutalibacteraceae;g__Acutalibacter;s__Acutalibacter sp009917445	0	0	0	0	0	0	0	0	0	0	0	0	0	0	0	0	0	0	0	0	0	0	0	0	0	0	0	5	0	0	0	0	0	0	0	0	0	0	0	0	0	0	0	0	0
d__Bacteria;p__Bacillota_I;c__Bacilli_A;o__Bacillales_A;f__Planococcaceae;g__Lysinibacillus_304693;s__Lysinibacillus fusiformis_D	0	0	0	0	0	0	0	0	0	0	0	0	0	0	0	0	0	0	0	0	0	0	0	0	0	5	0	0	0	0	0	0	0	0	0	0	0	0	0	0	0	0	0	0	0
d__Bacteria;p__Bacillota_A_368345;c__Clostridia_258483;o__Lachnospirales;f__Lachnospiraceae;g__Anaerobutyricum;s__Anaerobutyricum faecale	0	0	0	0	0	0	0	0	0	0	5	0	0	0	0	0	0	0	0	0	0	0	0	0	0	0	0	0	0	0	0	0	0	0	0	0	0	0	0	0	0	0	0	0	0
d__Bacteria;p__Bacillota_I;c__Bacilli_A;o__Lactobacillales;f__Lactobacillaceae;g__Lactobacillus;s__Lactobacillus crispatus	0	0	0	0	0	0	0	0	0	0	0	0	0	0	0	0	0	0	0	0	0	0	5	0	0	0	0	0	0	0	0	0	0	0	0	0	0	0	0	0	0	0	0	0	0
d__Bacteria;p__Bacillota_I;c__Bacilli_A;o__Erysipelotrichales;f__Erysipelotrichaceae;g__Merdibacter;s__	0	0	0	0	0	0	0	0	0	0	0	0	0	0	0	0	0	0	0	0	0	0	0	0	0	0	0	0	0	0	4	0	0	0	0	0	0	0	0	0	0	0	0	0	0
d__Bacteria;p__Actinomycetota;c__Actinomycetes;o__Actinomycetales;f__Micrococcaceae;g__Enteractinococcus;s__Enteractinococcus helveticum	0	0	0	0	0	0	0	0	0	0	0	0	0	0	0	0	0	0	0	0	0	0	0	0	0	0	0	0	0	0	0	0	0	0	0	0	0	0	0	0	0	0	0	4	0
d__Bacteria;p__Actinomycetota;c__Actinomycetes;o__Actinomycetales;f__Cellulomonadaceae;g__Actinotalea;s__Actinotalea ferrariae	0	0	0	0	0	0	0	0	0	0	0	0	0	0	0	0	0	0	0	0	0	0	0	0	0	0	0	0	0	0	0	0	0	0	4	0	0	0	0	0	0	0	0	0	0
d__Bacteria;p__Actinomycetota;c__Actinomycetes;o__Mycobacteriales;f__Mycobacteriaceae;g__Corynebacterium;s__Corynebacterium mastitidis	0	0	0	0	0	0	0	0	0	0	4	0	0	0	0	0	0	0	0	0	0	0	0	0	0	0	0	0	0	0	0	0	0	0	0	0	0	0	0	0	0	0	0	0	0
d__Bacteria;p__Bacillota_A_368345;c__Clostridia_258483;o__Lachnospirales;f__Lachnospiraceae;g__Sellimonas;s__Sellimonas intestinalis	0	0	0	0	0	0	0	0	0	0	4	0	0	0	0	0	0	0	0	0	0	0	0	0	0	0	0	0	0	0	0	0	0	0	0	0	0	0	0	0	0	0	0	0	0
d__Bacteria;p__Bacillota_A_368345;c__Clostridia_258483;o__Lachnospirales;f__Anaerotignaceae;g__Anaerotignum_189125;s__Anaerotignum lactatifermentans	0	0	0	0	0	0	0	0	0	0	0	0	0	0	0	0	0	0	0	0	0	0	0	0	0	0	0	0	3	0	0	0	0	0	0	0	0	0	0	0	0	0	0	0	0
d__Bacteria;p__Actinomycetota;c__Actinomycetes;o__Propionibacteriales;f__Propionibacteriaceae;g__Cutibacterium;s__Cutibacterium acnes	0	0	0	0	0	0	0	0	0	0	0	0	0	0	2	0	0	0	0	0	0	0	0	0	3	0	0	0	0	0	0	0	0	0	0	0	0	0	0	0	0	0	0	0	0
d__Bacteria;p__Pseudomonadota;c__Gammaproteobacteria;o__Enterobacterales_737866;f__Enterobacteriaceae_A_725029;g__Cedecea;s__Cedecea lapagei	0	0	0	0	0	0	0	0	0	0	0	0	0	0	0	0	0	0	0	0	0	0	3	0	0	0	0	0	0	0	0	0	0	0	0	0	0	0	0	0	0	0	0	0	0
d__Bacteria;p__Bacillota_A_368345;c__Clostridia_258483;o__Oscillospirales;f__Ruminococcaceae;g__Angelakisella;s__	0	0	0	0	0	0	0	0	0	0	0	0	0	0	0	0	0	0	0	0	0	0	0	0	0	0	0	0	0	0	0	0	0	0	0	0	0	0	0	0	0	0	0	3	0
d__Bacteria;p__Bacillota_A_368345;c__Clostridia_258483;o__Lachnospirales;f__CAG-274;g__CAG-274;s__Clostridium colinum	0	0	0	0	0	0	0	0	0	0	0	0	0	0	0	0	0	0	0	0	0	0	0	0	0	0	0	0	0	0	0	0	0	0	3	0	0	0	0	0	0	0	0	0	0
d__Bacteria;p__Bacillota_A_368345;c__Clostridia_258483;o__Oscillospirales;f__Ruminococcaceae;g__Huintestinicola;s__	0	0	0	0	0	0	0	0	0	0	0	0	0	0	0	0	0	0	0	0	0	0	0	0	0	0	0	0	0	0	0	0	3	0	0	0	0	0	0	0	0	0	0	0	0
d__Bacteria;p__Bacillota_I;c__Bacilli_A;o__Lactobacillales;f__Lactobacillaceae;g__Lactobacillus;s__Lactobacillus taiwanensis	0	0	0	0	0	0	0	0	0	0	0	0	0	0	0	0	0	0	0	0	0	0	0	0	0	0	0	0	0	0	0	0	3	0	0	0	0	0	0	0	0	0	0	0	0
d__Bacteria;p__Bacteroidota;c__Bacteroidia;o__Bacteroidales;f__Bacteroidaceae;g__Prevotella;s__Prevotella salivae	0	0	0	0	0	0	0	0	0	0	0	0	0	0	0	0	0	0	0	0	0	0	0	0	0	0	0	0	0	0	0	0	3	0	0	0	0	0	0	0	0	0	0	0	0
d__Bacteria;p__Actinomycetota;c__Actinomycetes;o__Actinomycetales;f__Micrococcaceae;g__Micrococcus;s__Micrococcus luteus	0	0	0	0	0	0	0	0	0	0	0	0	0	0	0	0	0	0	0	0	0	0	0	0	0	0	0	0	0	0	0	0	0	0	0	0	0	3	0	0	0	0	0	0	0
d__Bacteria;p__Bacillota_A_368345;c__Clostridia_258483;o__TANB77;f__CAG-508;g__CAG-273;s__	0	0	0	0	0	3	0	0	0	0	0	0	0	0	0	0	0	0	0	0	0	0	0	0	0	0	0	0	0	0	0	0	0	0	0	0	0	0	0	0	0	0	0	0	0
d__Bacteria;p__Bacillota_I;c__Bacilli_A;o__Lactobacillales;f__Streptococcaceae;g__Streptococcus;s__Streptococcus oralis_E_351036	0	0	0	0	0	3	0	0	0	0	0	0	0	0	0	0	0	0	0	0	0	0	0	0	0	0	0	0	0	0	0	0	0	0	0	0	0	0	0	0	0	0	0	0	0
d__Bacteria;p__Pseudomonadota;c__Gammaproteobacteria;o__Burkholderiales;f__Neisseriaceae;g__Conchiformibius;s__Conchiformibius steedae	0	0	0	0	0	0	0	3	0	0	0	0	0	0	0	0	0	0	0	0	0	0	0	0	0	0	0	0	0	0	0	0	0	0	0	0	0	0	0	0	0	0	0	0	0
d__Bacteria;p__Bacillota_A_368345;c__Clostridia_258483;o__Oscillospirales;f__Acutalibacteraceae;g__Fimenecus;s__Fimenecus sp000432435	0	0	0	0	0	0	0	0	3	0	0	0	0	0	0	0	0	0	0	0	0	0	0	0	0	0	0	0	0	0	0	0	0	0	0	0	0	0	0	0	0	0	0	0	0
d__Bacteria;p__Pseudomonadota;c__Gammaproteobacteria;o__GCA-001735895;f__GCA-001735895;g__GCA-001735895;s__GCA-001735895 sp001735895	0	0	0	0	3	0	0	0	0	0	0	0	0	0	0	0	0	0	0	0	0	0	0	0	0	0	0	0	0	0	0	0	0	0	0	0	0	0	0	0	0	0	0	0	0
d__Bacteria;p__Patescibacteria;c__Saccharimonadia;o__Saccharimonadales;f__Nanosyncoccaceae;g__Nanosyncoccus;s__Nanosyncoccus sp003979185	0	0	0	0	3	0	0	0	0	0	0	0	0	0	0	0	0	0	0	0	0	0	0	0	0	0	0	0	0	0	0	0	0	0	0	0	0	0	0	0	0	0	0	0	0
d__Bacteria;p__Bacillota_A_368345;c__Clostridia_258483;o__Lachnospirales;f__Lachnospiraceae;g__Blautia_A_141780;s__	0	0	0	0	0	0	0	0	0	0	0	0	0	0	0	0	0	0	0	0	3	0	0	0	0	0	0	0	0	0	0	0	0	0	0	0	0	0	0	0	0	0	0	0	0
d__Bacteria;p__Bacillota_A_368345;c__Clostridia_258483;o__Lachnospirales;f__Lachnospiraceae;g__Bovifimicola;s__	0	0	0	0	0	0	0	0	0	0	0	0	0	0	0	0	0	0	0	0	0	0	3	0	0	0	0	0	0	0	0	0	0	0	0	0	0	0	0	0	0	0	0	0	0
d__Bacteria;p__Bacillota_A_368345;c__Clostridia_258483;o__Tissierellales;f__Peptoniphilaceae;g__Peptoniphilus_A;s__Peptoniphilus_A timonensis	0	0	0	0	0	0	0	0	0	0	0	0	0	0	0	0	0	0	0	0	0	3	0	0	0	0	0	0	0	0	0	0	0	0	0	0	0	0	0	0	0	0	0	0	0
d__Bacteria;p__Pseudomonadota;c__Gammaproteobacteria;o__Burkholderiales;f__Burkholderiaceae_A_595421;g__Janthinobacterium_571526;s__Janthinobacterium lividum	0	0	0	0	0	0	0	0	0	0	0	0	0	0	0	0	0	0	0	0	0	3	0	0	0	0	0	0	0	0	0	0	0	0	0	0	0	0	0	0	0	0	0	0	0
d__Bacteria;p__Bacillota_A_368345;c__Clostridia_258483;o__Lachnospirales;f__Lachnospiraceae;g__Oribacterium;s__	0	0	0	0	0	0	0	0	0	0	0	0	0	0	0	0	3	0	0	0	0	0	0	0	0	0	0	0	0	0	0	0	0	0	0	0	0	0	0	0	0	0	0	0	0
d__Bacteria;p__Bacillota_A_368345;c__Clostridia_258483;o__Oscillospirales;f__Oscillospiraceae_88309;g__WRMH01;s__	0	0	0	0	0	0	0	0	0	0	0	0	0	0	0	0	0	0	0	0	0	0	0	2	0	0	0	0	0	0	0	0	0	0	0	0	0	0	0	0	0	0	0	0	0
d__Bacteria;p__Pseudomonadota;c__Gammaproteobacteria;o__Pseudomonadales_A_660879;f__Moraxellaceae;g__Acinetobacter;s__Acinetobacter radioresistens	0	0	0	0	0	0	0	0	0	0	0	0	0	0	0	0	0	0	0	0	0	2	0	0	0	0	0	0	0	0	0	0	0	0	0	0	0	0	0	0	0	0	0	0	0
d__Bacteria;p__Myxococcota_A_473307;c__Myxococcia;o__Myxococcales;f__Myxococcaceae;g__Aggregicoccus_463470;s__Aggregicoccus sp009659535	0	0	0	0	0	0	0	0	0	0	0	0	0	0	0	0	0	0	0	0	0	0	0	0	0	0	2	0	0	0	0	0	0	0	0	0	0	0	0	0	0	0	0	0	0
d__Bacteria;p__Bacteroidota;c__Bacteroidia;o__Bacteroidales;f__Bacteroidaceae;g__Prevotella;s__Prevotella histicola	0	0	0	0	0	0	0	0	0	0	0	0	0	0	0	0	0	0	0	0	0	0	0	0	0	0	0	0	0	0	0	0	0	0	0	0	0	0	0	0	0	0	2	0	0
d__Bacteria;p__Acidobacteriota;c__Terriglobia;o__Terriglobales;f__SbA1;g__;s__	0	0	0	0	0	0	0	0	0	0	0	0	0	0	0	0	0	0	0	0	0	0	0	0	0	0	0	0	0	0	0	0	0	0	2	0	0	0	0	0	0	0	0	0	0
d__Bacteria;p__Bacillota_A_368345;c__Clostridia_258483;o__Lachnospirales;f__CAG-274;g__CAG-274;s__CAG-274 sp900545305	0	0	0	0	0	0	0	0	0	0	0	0	0	0	0	0	0	0	0	0	0	0	0	0	0	0	0	0	0	0	0	0	2	0	0	0	0	0	0	0	0	0	0	0	0
d__Bacteria;p__Pseudomonadota;c__Gammaproteobacteria;o__Enterobacterales_737866;f__Enterobacteriaceae_A_725029;g__Klebsiella_724518;s__Klebsiella aerogenes	0	0	0	0	0	0	0	0	0	0	0	0	0	0	0	0	0	0	0	0	0	0	0	0	0	0	0	0	0	0	0	0	0	0	2	0	0	0	0	0	0	0	0	0	0
d__Bacteria;p__Bacillota_I;c__Bacilli_A;o__Lactobacillales;f__Lactobacillaceae;g__Lactobacillus;s__Lactobacillus intestinalis	0	0	0	0	0	0	0	0	2	0	0	0	0	0	0	0	0	0	0	0	0	0	0	0	0	0	0	0	0	0	0	0	0	0	0	0	0	0	0	0	0	0	0	0	0
d__Bacteria;p__Bacillota_A_368345;c__Clostridia_258483;o__Oscillospirales;f__Ruminococcaceae;g__Faecalibacterium;s__Faecalibacterium duncaniae	0	0	0	0	0	0	0	0	2	0	0	0	0	0	0	0	0	0	0	0	0	0	0	0	0	0	0	0	0	0	0	0	0	0	0	0	0	0	0	0	0	0	0	0	0
d__Bacteria;p__Bacillota_A_368345;c__Clostridia_258483;o__Oscillospirales;f__Ruminococcaceae;g__Merdimmobilis;s__Merdimmobilis hominis	0	0	2	0	0	0	0	0	0	0	0	0	0	0	0	0	0	0	0	0	0	0	0	0	0	0	0	0	0	0	0	0	0	0	0	0	0	0	0	0	0	0	0	0	0
d__Bacteria;p__Campylobacterota_A;c__Campylobacteria;o__Campylobacterales;f__Helicobacteraceae;g__Helicobacter_D_480075;s__Helicobacter_D_480075 canadensis	2	0	0	0	0	0	0	0	0	0	0	0	0	0	0	0	0	0	0	0	0	0	0	0	0	0	0	0	0	0	0	0	0	0	0	0	0	0	0	0	0	0	0	0	0
d__Bacteria;p__Bacteroidota;c__Bacteroidia;o__Bacteroidales;f__Bacteroidaceae;g__Prevotella;s__Prevotella buccae	2	0	0	0	0	0	0	0	0	0	0	0	0	0	0	0	0	0	0	0	0	0	0	0	0	0	0	0	0	0	0	0	0	0	0	0	0	0	0	0	0	0	0	0	0
d__Bacteria;p__Bacillota_I;c__Bacilli_A;o__Lactobacillales;f__Aerococcaceae;g__Aerococcus;s__Aerococcus urinaeequi	0	2	0	0	0	0	0	0	0	0	0	0	0	0	0	0	0	0	0	0	0	0	0	0	0	0	0	0	0	0	0	0	0	0	0	0	0	0	0	0	0	0	0	0	0
d__Bacteria;p__Bacteroidota;c__Bacteroidia;o__Bacteroidales;f__Porphyromonadaceae;g__Porphyromonas_A;s__Porphyromonas_A pasteri	0	0	0	2	0	0	0	0	0	0	0	0	0	0	0	0	0	0	0	0	0	0	0	0	0	0	0	0	0	0	0	0	0	0	0	0	0	0	0	0	0	0	0	0	0
d__Bacteria;p__Bacillota_I;c__Bacilli_A;o__Lactobacillales;f__Streptococcaceae;g__Lactococcus_A_343473;s__	0	0	0	0	0	0	0	0	0	0	0	0	0	0	0	0	0	0	2	0	0	0	0	0	0	0	0	0	0	0	0	0	0	0	0	0	0	0	0	0	0	0	0	0	0
d__Bacteria;p__Bacillota_A_368345;c__Clostridia_258483;o__Christensenellales;f__Aristaeellaceae;g__Limiplasma;s__Limiplasma merdipullorum	0	0	0	0	0	0	0	0	0	0	0	0	0	0	0	2	0	0	0	0	0	0	0	0	0	0	0	0	0	0	0	0	0	0	0	0	0	0	0	0	0	0	0	0	0
d__Bacteria;p__Pseudomonadota;c__Alphaproteobacteria;o__Rhizobiales_505101;f__Devosiaceae;g__Devosia_A_502124;s__Devosia_A_502124 geojensis	0	0	0	0	0	0	0	0	0	0	0	0	0	0	0	0	0	2	0	0	0	0	0	0	0	0	0	0	0	0	0	0	0	0	0	0	0	0	0	0	0	0	0	0	0
d__Bacteria;p__Bacteroidota;c__Bacteroidia;o__Bacteroidales;f__Muribaculaceae;g__Duncaniella;s__Duncaniella dubosii	0	0	0	0	0	0	0	0	0	0	0	0	0	0	0	0	2	0	0	0	0	0	0	0	0	0	0	0	0	0	0	0	0	0	0	0	0	0	0	0	0	0	0	0	0
d__Bacteria;p__Actinomycetota;c__Actinomycetes;o__Mycobacteriales;f__Mycobacteriaceae;g__Lawsonella;s__	0	0	0	0	0	0	0	0	0	0	0	0	0	0	0	0	0	0	0	0	0	2	0	0	0	0	0	0	0	0	0	0	0	0	0	0	0	0	0	0	0	0	0	0	0
d__Bacteria;p__Bacillota_A_368345;c__Clostridia_258483;o__TANB77;f__CAG-508;g__Merdicola;s__Merdicola sp900552655	0	0	0	0	0	0	0	0	0	0	0	0	0	0	0	0	0	0	0	0	2	0	0	0	0	0	0	0	0	0	0	0	0	0	0	0	0	0	0	0	0	0	0	0	0
d__Bacteria;p__Actinomycetota;c__Coriobacteriia;o__Coriobacteriales;f__Atopobiaceae;g__Thermophilibacter;s__Thermophilibacter avicola	0	0	0	0	0	0	0	0	0	0	2	0	0	0	0	0	0	0	0	0	0	0	0	0	0	0	0	0	0	0	0	0	0	0	0	0	0	0	0	0	0	0	0	0	0
d__Bacteria;p__Bacillota_A_368345;c__Clostridia_258483;o__Lachnospirales;f__Lachnospiraceae;g__Mediterraneibacter_A_155507;s__Mediterraneibacter_A_155507 cottocaccae	0	0	0	0	0	0	0	0	0	0	0	0	0	2	0	0	0	0	0	0	0	0	0	0	0	0	0	0	0	0	0	0	0	0	0	0	0	0	0	0	0	0	0	0	0
d__Bacteria;p__Bacteroidota;c__Bacteroidia;o__Bacteroidales;f__Bacteroidaceae;g__Bacteroides_E_842212;s__Bacteroides_E_842212 caecicola	0	0	0	0	0	0	0	0	0	0	0	0	0	2	0	0	0	0	0	0	0	0	0	0	0	0	0	0	0	0	0	0	0	0	0	0	0	0	0	0	0	0	0	0	0
d__Bacteria;p__Bacillota_A_368345;c__Clostridia_258483;o__Lachnospirales;f__Lachnospiraceae;g__Mediterraneibacter_A_155507;s__Mediterraneibacter_A_155507 massiliensis	0	0	0	0	0	0	0	0	0	0	0	0	2	0	0	0	0	0	0	0	0	0	0	0	0	0	0	0	0	0	0	0	0	0	0	0	0	0	0	0	0	0	0	0	0
